# Supplementary material
Source: PubMed Central journal article supplement (PMC3288381)
Supplement: NIHMS340426-supplement-1.pdf [file NIHMS340426-supplement-1.pdf]

## **SUPPLEMENTARY INFORMATION**

### **Spatiotemporal resolution of the Ntla transcriptome in axial mesoderm development**

Ilya A. Shestopalov<sup>1</sup>, Cameron L. W. Pitt<sup>1</sup>, and James K. Chen<sup>1</sup>

<sup>1</sup>Department of Chemical and Systems Biology, Stanford University School of Medicine,  
Stanford, CA 94305, USA

## SUPPLEMENTARY RESULTS

|                                     |       |
|-------------------------------------|-------|
| <b>Supplementary Table 1</b> .....  | 3-6   |
| <b>Supplementary Table 2</b> .....  | 7     |
| <b>Supplementary Table 3</b> .....  | 8-9   |
| <b>Supplementary Table 4</b> .....  | 10-11 |
| <b>Supplementary Table 5</b> .....  | 12    |
| <b>Supplementary Table 6</b> .....  | 13-15 |
| <b>Supplementary Table 7</b> .....  | 16    |
| <b>Supplementary Table 8</b> .....  | 17-18 |
| <b>Supplementary Table 9</b> .....  | 19    |
| <b>Supplementary Table 10</b> ..... | 20    |
| <b>Supplementary Table 11</b> ..... | 21-24 |
| <b>Supplementary Table 12</b> ..... | 25    |
| <b>Supplementary Table 13</b> ..... | 26    |
| <b>Supplementary Figure 1</b> ..... | 27    |
| <b>Supplementary Figure 2</b> ..... | 28    |
| <b>Supplementary Figure 3</b> ..... | 29    |
| <b>Supplementary Figure 4</b> ..... | 30    |
| <b>Supplementary Figure 5</b> ..... | 31    |
| <b>Supplementary Figure 6</b> ..... | 32    |
| <b>Supplementary Figure 7</b> ..... | 33    |
| <b>Supplementary Figure 8</b> ..... | 34    |
| <b>Supplementary Figure 9</b> ..... | 35    |

**Supplementary Table 1. cFD vs. *ntl*a cMO + cFD comparison at 9 hpf: 87 microarray hits ranked by fold change.**

Ensembl ID and chromosome locations correspond to zebrafish genome assembly Zv8, gene build 59 (May 2010).

| Entry | Gene symbol                           | Gene description                                                                            | Fold change | Zfin ID                      | Ensembl gene ID       | Nimblegen SEQ_ID   | Chr | Start    | End      |
|-------|---------------------------------------|---------------------------------------------------------------------------------------------|-------------|------------------------------|-----------------------|--------------------|-----|----------|----------|
| 1     | <i>si:ch211-215a10.5-001 (hpcal4)</i> | novel protein similar to vertebrate hippocalcin like 4                                      | -6.543      | <i>si:ch211-215a10.5-001</i> | <i>NP_001108159.1</i> | OTTDART00000018441 | 19  | 29460115 | 29462786 |
| 2     | <i>LOC563543 (inpp5b)</i>             | novel protein similar to vertebrate inositol polyphosphate-5-phosphatase                    | -6.093      | none                         | <i>LOC563543</i>      | ZV700S00001662     | 16  | 2599817  | 2639066  |
| 3     | <i>lhx1a</i>                          | LIM-homeobox 1a                                                                             | -6.092      | <i>lhx1a</i>                 | <i>lhx1a</i>          | AW077429           | 15  | 28135534 | 28143145 |
| 4     | <i>snai2</i>                          | snail homolog 2                                                                             | -5.700      | <i>snai2</i>                 | <i>snai2</i>          | OTTDART00000027124 | 24  | 33995692 | 34001705 |
| 5     | <i>notch1b</i>                        | notch homolog 1b                                                                            | -5.524      | <i>notch1b</i>               | <i>notch1b</i>        | OTTDART00000023258 | 5   | 67392870 | 67496053 |
| 6     | <i>si:dkey-49o11.4 (tbx3l)</i>        | novel protein similar to vertebrate t-box 3                                                 | -5.072      | <i>si:dkey-49o11.4</i>       | <i>LOC568479</i>      | OTTDART00000019838 | 5   | 24885216 | 24887665 |
| 7     | <i>wnt8a</i>                          | wingless-type MMTV integration site family, member 8a                                       | -4.652      | <i>wnt8a</i>                 | <i>wnt8a</i>          | OTTDART00000025914 | 14  | 36040558 | 36047793 |
| 8     | <i>LOC566628 (pskh2)</i>              | novel protein similar to vertebrate protein serine kinase H2                                | -4.616      | none                         | <i>LOC566628</i>      | ENSDART00000037703 | 12  | 40283700 | 40307825 |
| 9     | <i>lrrc8da</i>                        | novel protein similar to vertebrate leucine rich repeat containing 8 family, member D alpha | -4.602      | <i>lrrc8da</i>               | <i>A2BIH6_DANRE</i>   | OTTDART00000023505 | 2   | 22633903 | 22636380 |
| 10    | <i>atp1a1b</i>                        | ATPase, Na+/K+ transporting, alpha 1b polypeptide                                           | -4.371      | <i>atp1a1b</i>               | <i>atp1a1b</i>        | OTTDART00000026276 | 9   | 36416946 | 36437549 |
| 11    | <i>myod1</i>                          | myogenic determination factor 1                                                             | -4.290      | <i>myod1</i>                 | <i>myod1</i>          | OTTDART00000026919 | 25  | 32781654 | 32783858 |
| 12    | <i>si:dkey-146l2.1-001 (ankrd15)</i>  | novel protein similar to vertebrate ankyrin repeat domain 15                                | -4.281      | <i>si:dkey-146l2.1-001</i>   | <i>A2CEC3_DANRE</i>   | TC243640           | 5   | 43852500 | 43944459 |
| 13    | <i>zgc:91787 (b3gnt7)</i>             | novel protein similar to vertebrate beta-3-galactosyltransferase                            | -4.215      | <i>zgc:91787</i>             | <i>zgc:91787</i>      | OTTDART00000020258 | 8   | 22683762 | 22685318 |
| 14    | <i>col8a1a</i>                        | collagen, type VIII, alpha 1                                                                | -4.113      | <i>col8a1a</i>               | <i>col8a1a</i>        | AI397462           | 9   | 30487274 | 30499313 |
| 15    | <i>plp2</i>                           | proteolipid protein 2                                                                       | -4.036      | <i>plp2</i>                  | <i>plp2</i>           | TC260151           | 8   | 50452420 | 50499168 |
| 16    | <i>plod1a</i>                         | lysyl hydroxylase 1                                                                         | -3.848      | <i>plod1a</i>                | <i>plod1a</i>         | ZV700S00006183     | 8   | 49269611 | 49320332 |
| 17    | <i>ribc1</i>                          | RIB43A domain with coiled-coils 1                                                           | -3.614      | <i>ribc1</i>                 | <i>zgc:158280</i>     | ZV700S00001481     | 23  | 28138233 | 28145545 |
| 18    | <i>pip5k1c</i>                        | phosphatidylinositol-4-phosphate 5-kinase, type I, gamma                                    | -3.592      | <i>pip5k1c</i>               | <i>pip5k1c</i>        | ENSDART00000105443 | 22  | 17671179 | 17691603 |
| 19    | <i>pde4ba</i>                         | cAMP-specific 3',5'-cyclic phosphodiesterase 4B alpha                                       | -3.547      | <i>pde4ba</i>                | <i>LOC565706</i>      | ZV700S00006639     | 6   | 32670067 | 32747756 |
| 20    | <i>rbm38</i>                          | RNA binding motif protein 38                                                                | -3.483      | <i>rbm38</i>                 | <i>rbm38</i>          | OTTDART00000026624 | 23  | 4620570  | 4666179  |
| 21    | <i>lamp1</i>                          | lysosomal-associated membrane protein 1                                                     | -3.426      | <i>lamp1</i>                 | none                  | ZV700S00006436     | 9   | 34697159 | 34701323 |
| 22    | <i>cpn1</i>                           | carboxypeptidase N, polypeptide 1                                                           | -3.379      | <i>cpn1</i>                  | <i>cpn1</i>           | BC066689.1         | 12  | 30496591 | 30523965 |
| 23    | <i>abcc6b</i>                         | ATP-binding cassette, sub-family C, member 6b                                               | -3.344      | <i>abcc6b</i>                | <i>abcc6</i>          | ENSDART00000065433 | 6   | 11984572 | 12024328 |
| 24    | <i>dopey2</i>                         | dopey family member 2                                                                       | -3.341      | <i>dopey2</i>                | <i>dopey2</i>         | ENSDART00000078256 | 9   | 33581620 | 33595018 |

|    |                                  |                                                                                                          |        |                         |                           |                    |             |          |          |
|----|----------------------------------|----------------------------------------------------------------------------------------------------------|--------|-------------------------|---------------------------|--------------------|-------------|----------|----------|
| 25 | <i>kirrel3l</i>                  | kin of IRRE like 3 like                                                                                  | -3.334 | <i>kirrel3l</i>         | <i>kirrel3l</i>           | ZV700S00005154     | 9           | 26637783 | 26712362 |
| 26 | <i>aldh1a2</i>                   | aldehyde dehydrogenase 1 family, member A2                                                               | -3.255 | <i>aldh1a2</i>          | <i>aldh1a2</i>            | OTTDART00000025116 | 7           | 30625839 | 30666282 |
| 27 | <i>mxn1</i>                      | motor neuron and pancreas homeobox 1                                                                     | -3.252 | <i>mxn1</i>             | <i>mxn1</i>               | OTTDART00000013585 | 7           | 41141692 | 41144486 |
| 28 | <i>caskin1</i>                   | CASK-interacting protein 1                                                                               | -3.206 | none                    | <i>ENSDARG00000046107</i> | ENSDART00000040925 | 3           | 32954587 | 32996156 |
| 29 | <i>hmbox1b</i>                   | similar to homeobox containing 1                                                                         | -3.133 | <i>hmbox1b</i>          | <i>LOC564816</i>          | ENSDART00000008808 | Zv8_NA11417 | 178371   | 190934   |
| 30 | <i>pak1</i>                      | P21/Cdc42/Rac1-activated kinase 1                                                                        | -3.114 | <i>pak1</i>             | <i>pak1</i>               | ZV700S00006164     | 18          | 2188979  | 2204559  |
| 31 | <i>ppargc1a1</i>                 | peroxisome proliferator activated receptor gamma coactivator 1 alpha - like                              | -3.026 | <i>ppargc1a1</i>        | <i>ppargc1a1</i>          | ENSDART00000077731 | Zv8_NA6114  | 4577     | 28421    |
| 32 | <i>unc45b</i>                    | homolog of <i>C. elegans</i> unc-45B                                                                     | -3.013 | <i>unc45b</i>           | <i>unc45b</i>             | OTTDART00000024993 | 8           | 10979015 | 11004475 |
| 33 | <i>zgc:66052 (tagln3b)</i>       | novel protein similar to vertebrate transgelin 3                                                         | -2.939 | <i>zgc:66052</i>        | <i>zgc:66052</i>          | OTTDART00000028979 | 24          | 21471592 | 21485670 |
| 34 | <i>tbx6</i>                      | T-box gene 6                                                                                             | -2.919 | <i>tbx6</i>             | <i>tbx6</i>               | OTTDART00000022473 | 5           | 41292606 | 41309337 |
| 35 | <i>myf5</i>                      | myogenic factor 5                                                                                        | -2.788 | <i>myf5</i>             | <i>myf5</i>               | OTTDART00000009544 | 4           | 21534374 | 21538246 |
| 36 | <i>hdr</i>                       | hematopoietic death receptor                                                                             | -2.773 | <i>hdr</i>              | <i>hdr</i>                | OTTDART00000019823 | 5           | 25528873 | 25539033 |
| 37 | <i>rgmb</i>                      | RGM domain family, member B                                                                              | -2.721 | <i>rgmb</i>             | <i>rgmb</i>               | OTTDART00000022855 | 5           | 48756554 | 48774922 |
| 38 | <i>trpv4</i>                     | transient receptor potential cation channel, subfamily V, member 4                                       | -2.712 | <i>trpv4</i>            | <i>trpv4</i>              | OTTDART00000019252 | 5           | 17734760 | 17772071 |
| 39 | <i>tacc2</i>                     | transforming, acidic coiled-coil containing protein 2                                                    | -2.693 | <i>tacc2</i>            | <i>tacc2</i>              | ZV700S00006103     | 13          | 33046650 | 33082675 |
| 40 | <i>adora2ab</i>                  | adenosine receptor A2a.2                                                                                 | -2.677 | <i>adora2ab</i>         | <i>NP_001035125.1</i>     | NM_001040036       | 21          | 10544202 | 10563719 |
| 41 | <i>hspa12a</i>                   | heat shock 70 kDa protein 12A                                                                            | -2.660 | <i>hspa12a</i>          | <i>zgc:153612</i>         | ZV700S00001957     | 17          | 18786426 | 18805408 |
| 42 | <i>zgc:153027 (esm1)</i>         | novel protein similar to vertebrate endothelial cell-specific molecule 1                                 | -2.637 | <i>zgc:153027</i>       | <i>zgc:153027</i>         | TC263451           | 21          | 8194010  | 8198200  |
| 43 | <i>kidins220a</i>                | kinase D-interacting substance of 220 kDa                                                                | -2.603 | <i>kidins220a</i>       | <i>si:dkey-177f17.1</i>   | OTTDART00000007862 | 17          | 33031518 | 33087170 |
| 44 | <i>si:dkey-195c14.1 (sall3l)</i> | novel protein similar to vertebrate sal-like 3                                                           | -2.552 | <i>si:dkey-195c14.1</i> | <i>si:dkey-195c14.1</i>   | OTTDART00000017492 | 19          | 20764504 | 20773732 |
| 45 | <i>smyd1b</i>                    | SET and MYND domain containing 1b                                                                        | -2.532 | <i>smyd1b</i>           | <i>smyd1b</i>             | NM_001039636       | 8           | 1232945  | 1278872  |
| 46 | <i>her1</i>                      | hairy-related 1                                                                                          | -2.529 | <i>her1</i>             | <i>her1</i>               | OTTDART00000023081 | 5           | 70458828 | 70465219 |
| 47 | <i>p4ha1</i>                     | procollagen-proline, 2-oxoglutarate 4-dioxygenase (proline 4-hydroxylase), alpha polypeptide I           | -2.512 | <i>p4ha1</i>            | <i>p4ha1</i>              | OTTDART00000025381 | 17          | 16492035 | 16511758 |
| 48 | <i>hfe2</i>                      | hemochromatosis type 2                                                                                   | -2.485 | <i>hfe2</i>             | <i>hfe2</i>               | NM_213643          | 16          | 42382086 | 42527246 |
| 49 | <i>zgc:163023 (tspan4)</i>       | novel protein similar to vertebrate tetraspanin 4                                                        | -2.460 | <i>zgc:163023</i>       | <i>zgc:163023</i>         | NM_001082807       | 3           | 29844005 | 29853390 |
| 50 | <i>lrch2</i>                     | leucine-rich repeats and calponin homology (CH) domain containing 2                                      | -2.431 | <i>lrch2</i>            | <i>lrch2</i>              | OTTDART00000030270 | 5           | 34818824 | 34844320 |
| 51 | <i>lipg</i>                      | lipase, endothelial                                                                                      | -2.429 | <i>lipg</i>             | <i>lipg</i>               | OTTDART00000028618 | 8           | 33133042 | 33142110 |
| 52 | <i>ttna</i>                      | titin a                                                                                                  | -2.415 | <i>ttna</i>             | <i>ttna</i>               | OTTDART00000029928 | 9           | 43263480 | 43328198 |
| 53 | <i>itgb5</i>                     | integrin, beta 5                                                                                         | -2.400 | <i>itgb5</i>            | <i>itgb5</i>              | OTTDART00000014003 | 9           | 22031250 | 22101761 |
| 54 | <i>actn2</i>                     | actinin, alpha 2                                                                                         | -2.384 | <i>actn2</i>            | <i>actn2</i>              | OTTDART00000029626 | 17          | 16515238 | 16537141 |
| 55 | <i>zgc:92198 (camk2n2)</i>       | novel protein similar to vertebrate Ca <sup>2+</sup> /calmodulin-dependent protein kinase II inhibitor 2 | -2.367 | <i>zgc:92198</i>        | <i>zgc:92198</i>          | NM_001002642       | 24          | 25360048 | 25362300 |

|                           |                                       |                                                                                      |        |                          |                           |                    |           |          |          |
|---------------------------|---------------------------------------|--------------------------------------------------------------------------------------|--------|--------------------------|---------------------------|--------------------|-----------|----------|----------|
| 56                        | <i>fadd</i>                           | fas (tnfrsf6)-associated via death domain                                            | -2.341 | <i>fadd</i>              | <i>fadd</i>               | TC242683           | 7         | 55882294 | 55888612 |
| 57                        | <i>wnt3l</i>                          | wingless-type MMTV integration site family, member 3 like                            | -2.338 | <i>wnt3l</i>             | <i>wnt3l</i>              | NM_001007185       | 2         | 2309950  | 2311326  |
| 58                        | <i>mesp2</i>                          | mesoderm posterior 2 homolog                                                         | -2.333 | <i>mesp2</i>             | <i>A3KPB3_DANRE</i>       | ENSDART00000102928 | 25        | 9383009  | 9384267  |
| 59                        | <i>twist2</i>                         | twist 2                                                                              | -2.333 | <i>twist2</i>            | <i>twist2</i>             | NM_001005956       | 9         | 46391351 | 46391842 |
| 60                        | <i>ttnb</i>                           | titin b                                                                              | -2.327 | <i>ttnb</i>              | <i>ttnb</i>               | OTTDART00000026898 | 9         | 42989675 | 43130539 |
| 61                        | <i>st3gal2l</i>                       | ST3 beta-galactoside alpha-2,3-sialyltransferase 2, like                             | -2.321 | <i>st3gal2l</i>          | <i>st3gal2l</i>           | TC249907           | 11        | 26392769 | 26414674 |
| 62                        | <i>sort1b</i>                         | sortilin 1, like                                                                     | -2.284 | <i>sort1b</i>            | <i>sort1b</i>             | OTTDART00000013761 | 8         | 25809473 | 25842079 |
| 63                        | <i>hmcn1</i>                          | hemicentin 1                                                                         | -2.272 | <i>hmcn1</i>             | <i>hmcn1</i>              | OTTDART00000006813 | 20        | 34056841 | 34169854 |
| 64                        | <i>irx3a</i>                          | iroquois homeobox protein 3a                                                         | -2.242 | <i>irx3a</i>             | <i>irx3a</i>              | ZV700S00006366     | 7         | 36391615 | 36394934 |
| 65                        | <i>sall1a</i>                         | sal-like 1a                                                                          | -2.206 | <i>sall1a</i>            | <i>sall1a</i>             | ZV700S00001341     | 7         | 37784931 | 37793542 |
| 66                        | <i>tnfaip6</i>                        | tumor necrosis factor, alpha-induced protein 6                                       | -2.200 | <i>tnfaip6</i>           | <i>tnfaip6</i>            | TC245382           | 9         | 22117982 | 22133555 |
| 67                        | <i>zgc:66433 (KIAA1211)</i>           | novel protein similar to vertebrate uncharacterized protein KIAA1211                 | -2.200 | <i>zgc:66433</i>         | <i>zgc:66433</i>          | OTTDART00000028901 | 14        | 22214800 | 22296654 |
| 68                        | <i>inka1a</i>                         | induced in neural crest by AP2, 1a                                                   | -2.170 | <i>inka1a</i>            | <i>inka1a</i>             | ZV700S00000040     | 11        | 35101810 | 35108146 |
| 69                        | <i>meis4.1a</i>                       | myeloid ecotropic viral integration site 4.1a                                        | -2.155 | <i>meis4.1a</i>          | <i>meis4.1a</i>           | OTTDART00000023940 | 1         | 51288174 | 51319427 |
| 70                        | <i>dlc</i>                            | deltaC                                                                               | -2.146 | <i>dlc</i>               | <i>dlc</i>                | OTTDART00000025961 | 15        | 20634176 | 20639029 |
| 71                        | <i>kitlga</i>                         | kit ligand a                                                                         | -2.145 | <i>kitlga</i>            | <i>kitlga</i>             | ENSDART00000104502 | 25        | 18638925 | 18658676 |
| 72                        | <i>prickle2</i>                       | prickle-like 2                                                                       | -2.135 | <i>prickle2</i>          | <i>prickle2</i>           | AY278987.1         | 11        | 18849431 | 18895050 |
| 73                        | <i>wwp2</i>                           | WW domain containing E3 ubiquitin protein ligase 2                                   | -2.121 | <i>wwp2</i>              | <i>wwp2</i>               | TC261671           | 25        | 34924572 | 34978790 |
| 74                        | <i>ENSDARG00000063075 (c20orf117)</i> | novel protein similar to vertebrate uncharacterized protein c20orf117                | -2.120 | none                     | <i>ENSDARG00000063075</i> | ENSDART00000091852 | 23        | 8047246  | 8130572  |
| 75                        | <i>ube2e3</i>                         | ubiquitin-conjugating enzyme E2E 3                                                   | -2.120 | <i>ube2e3</i>            | <i>ube2e3</i>             | OTTDART00000026433 | 9         | 44146061 | 44228245 |
| 76                        | <i>kif1b</i>                          | kinesin family member 1B                                                             | -2.085 | <i>kif1b</i>             | <i>kif1b</i>              | ZV700S00001465     | 23        | 28894800 | 28957280 |
| 77                        | <i>notch2</i>                         | notch homolog 2                                                                      | -2.072 | <i>notch2</i>            | <i>notch2</i>             | ZV700S00005786     | 8         | 19943482 | 19983080 |
| 78                        | <i>si:ch211-285f17.1 (KIAA1217)</i>   | novel protein similar to vertebrate sickle tail protein homolog                      | -2.030 | <i>si:ch211-285f17.1</i> | <i>ENSDARG00000031658</i> | TC253143           | 24        | 9246424  | 9333914  |
| 79                        | <i>id:ibd2573 (creb3l1)</i>           | novel protein similar to vertebrate cAMP responsive element binding protein 3-like 1 | -2.021 | <i>id:ibd2573</i>        | <i>LOC566720</i>          | ENSDART00000074532 | 7         | 39330933 | 39358257 |
| 80                        | <i>fgf24</i>                          | fibroblast growth factor 24                                                          | -2.020 | <i>fgf24</i>             | <i>fgf24</i>              | OTTDART0000002076  | 14        | 6156422  | 6194919  |
| 81                        | <i>tnfrsfa</i>                        | tumor necrosis factor receptor superfamily, member a                                 | -2.013 | <i>tnfrsfa</i>           | <i>tnfrsfa</i>            | ZV700S00000235     | 21        | 16565637 | 16612107 |
| 82                        | <i>zgc:165655</i>                     | novel pleckstrin domain protein                                                      | -2.009 | <i>zgc:165655</i>        | <i>zgc:165655</i>         | NM_001098779       | 16        | 34734527 | 34792568 |
| 82/87 (94%) downregulated |                                       |                                                                                      |        |                          |                           |                    |           |          |          |
| 83                        | <i>myom3</i>                          | myomesin family, member 3                                                            | +2.002 | <i>myom3</i>             | <i>myom3</i>              | ENSDART00000101501 | Zv8_NA513 | 18129    | 78285    |
| 84                        | <i>nmnat2</i>                         | nicotinamide nucleotide adenyltransferase 2                                          | +2.027 | <i>nmnat2</i>            | <i>nmnat2</i>             | OTTDART00000020501 | 2         | 34068428 | 34082906 |
| 85                        | <i>hbp1</i>                           | HMG box-containing protein 1                                                         | +2.037 | <i>hbp1</i>              | <i>zgc:112297</i>         | AW282104           | 25        | 2564423  | 2584269  |

|                       |                |                                                           |        |                |                |                    |    |          |          |
|-----------------------|----------------|-----------------------------------------------------------|--------|----------------|----------------|--------------------|----|----------|----------|
| 86                    | <i>rbms3</i>   | Single-stranded RNA interacting protein                   | +2.095 | <i>rbms3</i>   | <i>rbms3</i>   | TC267504           | 16 | 38456043 | 38671893 |
| 87                    | <i>pdgfrb2</i> | platelet-derived growth factor receptor beta 1.2 fragment | +2.442 | <i>pdgfrb2</i> | <i>pdgfrb2</i> | ENSDART00000028255 | 14 | 4208337  | 4211507  |
| 5/87 (6%) upregulated |                |                                                           |        |                |                |                    |    |          |          |

**Supplementary Table 2. cFD vs. *ntla* cMO + cFD comparison at 16 hpf: 12 microarray hits ranked by fold change.**

Ensembl ID and chromosome locations correspond to zebrafish genome assembly Zv8, gene build 59 (May 2010).

| Entry                    | Gene symbol                       | Gene description                                                                                 | Fold change | Zfin ID                 | Ensembl gene ID           | Nimblegen SEQ_ID   | Chr | Start    | End      |
|--------------------------|-----------------------------------|--------------------------------------------------------------------------------------------------|-------------|-------------------------|---------------------------|--------------------|-----|----------|----------|
| 1                        | <i>LOC795255 (slc38a8)</i>        | novel protein similar to vertebrate soluble carrier family 38 protein                            | -4.917      | none                    | <i>LOC795255</i>          | BQ132767           | 7   | 29413983 | 29422236 |
| 2                        | <i>cav3</i>                       | caveolin 3                                                                                       | -2.717      | <i>cav3</i>             | <i>cav3</i>               | AY124574.1         | 6   | 45637427 | 45645163 |
| 3                        | <i>znf385b</i>                    | zinc finger protein 385b                                                                         | -2.357      | <i>znf385b</i>          | <i>znf385b</i>            | OTTDART00000001965 | 9   | 43499966 | 43886239 |
| 4                        | <i>tspan7b</i>                    | tetraspanin 7b                                                                                   | -2.318      | <i>tspan7b</i>          | <i>tspan7b</i>            | ZV700S00005092     | 22  | 13702361 | 13754893 |
| 5                        | <i>si:dkey-205o12.2 (prk1)</i>    | novel protein similar to vertebrate pim oncogene related kinase 1                                | -2.073      | <i>si:dkey-205o12.2</i> | <i>si:dkey-205o12.2</i>   | ENSDART00000100940 | 8   | 13504646 | 13505939 |
| 6                        | <i>si:dkeyp-122e7.1 (znf804a)</i> | novel protein similar to vertebrate zinc finger 804a                                             | -2.051      | <i>si:dkeyp-122e7.1</i> | <i>ENSDARG00000027079</i> | ZV700S00000778     | 9   | 11484108 | 11611524 |
| 7                        | <i>ptrfb</i>                      | polymerase I and transcript release factor b                                                     | -2.046      | <i>ptrfb</i>            | <i>ptrfb</i>              | ZV700S00003617     | 24  | 7593206  | 7623842  |
| 8                        | <i>zgc:174919</i>                 | novel protein containing zinc finger domain                                                      | -2.039      | <i>zgc:174919</i>       | <i>zgc:174919</i>         | ENSDART00000106259 | 22  | 3102571  | 3109743  |
| 9                        | <i>zgc:110418 (kcnk6)</i>         | novel protein similar to vertebrate potassium inwardly-rectifying channel, subfamily K, member 6 | -2.030      | <i>zgc:110418</i>       | <i>zgc:110418</i>         | TC241224           | 18  | 45049012 | 45058866 |
| 9/12 (75%) downregulated |                                   |                                                                                                  |             |                         |                           |                    |     |          |          |
| 10                       | <i>wu:fd47f06 (guca2b)</i>        | novel protein similar to vertebrate guanylate cyclase activator 2b                               | +2.095      | <i>wu:fd47f06</i>       | none                      | ENSDART0000028699  | 11  | 27970374 | 27971060 |
| 11                       | <i>ntla</i>                       | no tail-a                                                                                        | +2.225      | <i>ntla</i>             | <i>ntla</i>               | ZV700S00001498     | 19  | 20033640 | 20038792 |
| 12                       | <i>frzb</i>                       | frizzled-related protein                                                                         | +3.320      | <i>frzb</i>             | <i>frzb</i>               | ZV700S00006289     | 9   | 47742998 | 47749719 |
| 3/12 (25%) upregulated   |                                   |                                                                                                  |             |                         |                           |                    |     |          |          |

**Supplementary Table 3. Microarray hits that overlap with previously reported Ntla targets.**

\*Mesodermal expression domains in gastrula-stage embryos (6-9 hpf)

\*\*Mesodermal expression domains in bud-stage embryos (10 hpf)

| Entry | Gene symbol                | Gene description                                      | Expression domain in zebrafish               | Previously reported direct target? <sup>1</sup> | Previously reported transcriptional target?                    |
|-------|----------------------------|-------------------------------------------------------|----------------------------------------------|-------------------------------------------------|----------------------------------------------------------------|
| 1     | <i>dlc</i>                 | deltaC                                                | Ventrolateral margin*<br>Paraxial**          | 6 probes                                        | No                                                             |
| 2     | <i>wnt8a</i>               | wingless-type MMTV integration site family, member 8a | Ventrolateral margin*<br>Tailbud**           | 5 probes, T-box clusters                        | Yes <sup>2</sup>                                               |
| 3     | <i>aldh1a2</i>             | aldehyde dehydrogenase 1 family, member A2            | Ventrolateral margin*<br>Paraxial**          | 4 probes, T-box clusters                        | 1.5-fold decrease in expression upon loss of Ntla <sup>3</sup> |
| 4     | <i>her1</i>                | hairy-related 1                                       | Ventrolateral margin*<br>Tailbud, Paraxial** | 4 probes                                        | 1.5-fold decrease in expression upon loss of Ntla <sup>3</sup> |
| 5     | <i>kirrel3l</i>            | kin of IRRE like 3 like                               | Axial, Margin*<br>Axial**                    | 3 probes, T-box clusters                        | No                                                             |
| 6     | <i>rbm38</i>               | RNA binding motif protein 38                          | Tailbud, Paraxial**                          | 3 probes                                        | 2.1-fold decrease in expression with loss of Ntla <sup>3</sup> |
| 7     | <i>irx3a</i>               | iroquois homeobox protein 3a                          | Axial*<br>Axial**                            | 3 probes                                        | No                                                             |
| 8     | <i>tbx6</i>                | T-box gene 6                                          | Ventrolateral margin*<br>Tailbud, Paraxial** | 2 probes, T-box clusters                        | 1.7-fold decrease in expression with loss of Ntla <sup>3</sup> |
| 9     | <i>fgf24</i>               | fibroblast growth factor 24                           | Margin*<br>Tailbud, Paraxial**               | 2 probes, T-box clusters                        | No                                                             |
| 10    | <i>ube2e3</i>              | ubiquitin-conjugating enzyme E2E 3                    | Not reported                                 | 2 probes                                        | No                                                             |
| 11    | <i>myod1</i>               | myogenic determination factor 1                       | Paraxial margin*<br>Paraxial**               | 1 probe                                         | No                                                             |
| 12    | <i>tnfaip6</i>             | tumor necrosis factor, alpha-induced protein 6        | Not reported                                 | 1 probe, T-box clusters                         | No                                                             |
| 13    | <i>zgc:66052 (tagln3b)</i> | novel protein similar to vertebrate transgelin 3      | Axial, Other*<br>Axial, Other**              | T-box clusters                                  | 5.0-fold decrease in expression with loss of Ntla <sup>3</sup> |
| 14    | <i>zgc:163023 (tspan4)</i> | novel protein similar to vertebrate tetraspanin 4     | Axial, Margin*                               | No                                              | 6.9-fold decrease in expression with loss of Ntla <sup>3</sup> |
| 15    | <i>hspa12a</i>             | heat shock 70 kDa protein 12A                         | Not reported                                 | No                                              | 4.4-fold decrease in expression with loss of Ntla <sup>3</sup> |



|    |              |                                                       |                           |    |                                                                |
|----|--------------|-------------------------------------------------------|---------------------------|----|----------------------------------------------------------------|
| 16 | <i>tacc2</i> | transforming, acidic coiled-coil containing protein 2 | Axial, Margin*<br>Axial** | No | 2.7-fold decrease in expression with loss of Ntla <sup>3</sup> |
| 17 | <i>plp2</i>  | proteolipid protein 2                                 | Paraxial**                | No | 2.3-fold decrease in expression with loss of Ntla <sup>3</sup> |

**Supplementary Table 4. cFD vs. *ntl*a cMO + cFD comparison at 9 hpf: 55 microarray hits with known expression patterns, grouped by their expression domain at 10 hpf and ranked by fold change.**

\*Expression domains highlighted in bold font were confirmed to be *Ntla*-dependent by *in situ* hybridization.

| Entry | Gene symbol                           | Gene description                                                                                         | Expression domain at 10 hpf* | Fold change |
|-------|---------------------------------------|----------------------------------------------------------------------------------------------------------|------------------------------|-------------|
| 1     | <i>si:ch211-215a10.5-001 (hpcal4)</i> | novel protein similar to vertebrate hippocalcin like 4                                                   | <b>Axial</b>                 | -6.543      |
| 2     | <i>LOC563543 (inpp5b)</i>             | novel protein similar to vertebrate inositol polyphosphate-5-phosphatase                                 | <b>Axial</b>                 | -6.093      |
| 3     | <i>snai2</i>                          | snail homolog 2                                                                                          | <b>Axial</b>                 | -5.700      |
| 4     | <i>LOC566628 (pskh2)</i>              | novel protein similar to vertebrate protein serine kinase H2                                             | <b>Axial</b>                 | -4.616      |
| 5     | <i>lrrc8da</i>                        | novel protein similar to vertebrate leucine rich repeat containing 8 family, member D alpha              | <b>Axial</b>                 | -4.602      |
| 6     | <i>zgc:91787 (b3gnt7)</i>             | novel protein similar to vertebrate beta-3-galactosyltransferase                                         | <b>Axial</b>                 | -4.215      |
| 7     | <i>col8a1a</i>                        | collagen, type VIII, alpha 1                                                                             | <b>Axial</b>                 | -4.113      |
| 8     | <i>plod1a</i>                         | lysyl hydroxylase 1                                                                                      | <b>Axial</b>                 | -3.848      |
| 9     | <i>mnx1</i>                           | motor neuron and pancreas homeobox 1                                                                     | <b>Axial</b>                 | -3.252      |
| 10    | <i>pak1</i>                           | P21/Cdc42/Rac1-activated kinase 1                                                                        | <b>Axial</b>                 | -3.114      |
| 11    | <i>hdr</i>                            | hematopoietic death receptor                                                                             | Axial                        | -2.773      |
| 12    | <i>rgmb</i>                           | RGM domain family, member B                                                                              | Axial                        | -2.721      |
| 13    | <i>trpv4</i>                          | transient receptor potential cation channel, subfamily V, member 4                                       | Axial                        | -2.712      |
| 14    | <i>tacc2</i>                          | transforming, acidic coiled-coil containing protein 2                                                    | <b>Axial</b>                 | -2.693      |
| 15    | <i>p4ha1</i>                          | procollagen-proline, 2-oxoglutarate 4-dioxygenase (proline 4-hydroxylase), alpha polypeptide I           | <b>Axial</b>                 | -2.512      |
| 16    | <i>hfe2</i>                           | hemochromatosis type 2                                                                                   | Axial                        | -2.485      |
| 17    | <i>lrch2</i>                          | leucine-rich repeats and calponin homology (CH) domain containing 2                                      | <b>Axial</b>                 | -2.431      |
| 18    | <i>lipg</i>                           | lipase, endothelial                                                                                      | Axial                        | -2.429      |
| 19    | <i>zgc:92198 (camk2n2)</i>            | novel protein similar to vertebrate Ca <sup>2+</sup> /calmodulin-dependent protein kinase II inhibitor 2 | Axial                        | -2.367      |
| 20    | <i>fadd</i>                           | fas (tnfrsf6)-associated via death domain                                                                | Axial                        | -2.341      |
| 21    | <i>twist2</i>                         | twist 2                                                                                                  | Axial                        | -2.333      |
| 22    | <i>hmcn1</i>                          | hemicentin 1                                                                                             | Axial                        | -2.272      |
| 23    | <i>irx3a</i>                          | iroquois homeobox protein 3a                                                                             | Axial                        | -2.242      |
| 24    | <i>sall1a</i>                         | sal-like 1a                                                                                              | Axial                        | -2.206      |
| 25    | <i>inka1a</i>                         | induced in neural crest by AP2, 1a                                                                       | Axial                        | -2.17       |
| 26    | <i>prickle2</i>                       | prickle-like 2                                                                                           | <b>Axial</b>                 | -2.135      |
| 27    | <i>wwp2</i>                           | WW domain containing E3 ubiquitin protein ligase 2                                                       | Axial                        | -2.121      |

|                                                                                      |                             |                                                                                      |                                        |        |
|--------------------------------------------------------------------------------------|-----------------------------|--------------------------------------------------------------------------------------|----------------------------------------|--------|
| 28                                                                                   | <i>id:ibd2573 (creb3l1)</i> | novel protein similar to vertebrate cAMP responsive element binding protein 3-like 1 | Axial                                  | -2.021 |
| 29                                                                                   | <i>tnfrsfa</i>              | tumor necrosis factor receptor superfamily, member a                                 | Axial                                  | -2.013 |
| 30                                                                                   | <i>lhx1a</i>                | LIM-homeobox 1a                                                                      | <b>Axial</b> , Other                   | -6.092 |
| 31                                                                                   | <i>notch1b</i>              | notch homolog 1b                                                                     | <b>Axial</b> , Other                   | -5.524 |
| 32                                                                                   | <i>kirrel3l</i>             | kin of IRRE like 3 like                                                              | <b>Axial</b> , Other                   | -3.334 |
| 33                                                                                   | <i>zgc:66052 (tagln3b)</i>  | novel protein similar to vertebrate transgelin 3                                     | Axial, Other                           | -2.939 |
| 34                                                                                   | <i>zgc:66433 (KIAA1211)</i> | novel protein similar to vertebrate uncharacterized protein KIAA1211                 | Axial, Other                           | -2.200 |
| 34/55 (62%) with axial expression                                                    |                             |                                                                                      |                                        |        |
| 35                                                                                   | <i>myod1</i>                | myogenic determination factor 1                                                      | <b>Paraxial</b>                        | -4.290 |
| 36                                                                                   | <i>plp2</i>                 | proteolipid protein 2                                                                | Paraxial                               | -4.036 |
| 37                                                                                   | <i>cpn1</i>                 | carboxypeptidase N, polypeptide 1                                                    | Paraxial                               | -3.379 |
| 38                                                                                   | <i>aldh1a2</i>              | aldehyde dehydrogenase 1 family, member A2                                           | <b>Paraxial</b>                        | -3.255 |
| 39                                                                                   | <i>ppargc1al</i>            | peroxisome proliferator activated receptor gamma coactivator 1 alpha - like          | Paraxial                               | -3.026 |
| 40                                                                                   | <i>unc45b</i>               | homolog of <i>C. elegans</i> unc-45B                                                 | <b>Paraxial</b>                        | -3.013 |
| 41                                                                                   | <i>myf5</i>                 | myogenic factor 5                                                                    | Paraxial                               | -2.788 |
| 42                                                                                   | <i>smyd1b</i>               | SET and MYND domain containing 1b                                                    | Paraxial                               | -2.532 |
| 43                                                                                   | <i>ttna</i>                 | titin a                                                                              | Paraxial                               | -2.415 |
| 44                                                                                   | <i>ttnb</i>                 | titin b                                                                              | Paraxial                               | -2.327 |
| 45                                                                                   | <i>meis4.1a</i>             | myeloid ecotropic viral integration site 4.1a                                        | Paraxial                               | -2.155 |
| 46                                                                                   | <i>dlc</i>                  | deltaC                                                                               | Paraxial                               | -2.146 |
| 47                                                                                   | <i>notch2</i>               | notch homolog 2                                                                      | Paraxial                               | -2.072 |
| 13/55 (24%) with paraxial expression                                                 |                             |                                                                                      |                                        |        |
| 48                                                                                   | <i>wnt8a</i>                | wingless-type MMTV integration site family, member 8a                                | <b>Tailbud</b> , Other                 | -4.652 |
| 49                                                                                   | <i>rbm38</i>                | RNA binding motif protein 38                                                         | <b>Tailbud</b> , Paraxial              | -3.483 |
| 50                                                                                   | <i>adora2ab</i>             | adenosine receptor A2a.2                                                             | Tailbud, Other                         | -2.677 |
| 51                                                                                   | <i>her1</i>                 | hairy-related 1                                                                      | <b>Tailbud</b> , <b>Paraxial</b>       | -2.529 |
| 52                                                                                   | <i>tbx6</i>                 | T-box gene 6                                                                         | <b>Tailbud</b> , Paraxial              | -2.919 |
| 53                                                                                   | <i>wnt3l</i>                | wingless-type MMTV integration site family, member 3 like                            | <b>Tailbud</b> <sup>4</sup> , Paraxial | -2.338 |
| 54                                                                                   | <i>st3gal2l</i>             | ST3 beta-galactoside alpha-2,3-sialyltransferase 2, like                             | Tailbud, Paraxial                      | -2.321 |
| 55                                                                                   | <i>fgf24</i>                | fibroblast growth factor 24                                                          | Tailbud, Paraxial                      | -2.020 |
| 8/55 (14%) with tailbud expression                                                   |                             |                                                                                      |                                        |        |
| 25/25 (100%) shown to have Ntla-dependent expression by <i>in situ</i> hybridization |                             |                                                                                      |                                        |        |

**Supplementary Table 5. cFD vs. *ntla* cMO + cFD comparison at 16 hpf: 9 microarray hits with known expression patterns, grouped by their expression domain at 16 hpf and ranked by fold change.**

\*Expression domains in highlighted in bold font were confirmed to be *Ntla*-dependent *in situ* hybridization.

| Entry                            | Gene symbol                 | Gene description                                                                                 | Expression domain at 16 hpf* | Fold change |
|----------------------------------|-----------------------------|--------------------------------------------------------------------------------------------------|------------------------------|-------------|
| 1                                | <i>LOC795255 (slc38a8)</i>  | novel protein similar to vertebrate soluble carrier family 38 protein                            | <b>Axial</b>                 | -4.917      |
| 2                                | <i>znf385b</i>              | zinc finger protein 385b                                                                         | <b>Axial</b>                 | -2.357      |
| 3                                | <i>tspan7b</i>              | tetraspanin 7b                                                                                   | <b>Axial</b>                 | -2.318      |
| 4                                | <i>ptrfb</i>                | polymerase I and transcript release factor b                                                     | <b>Axial</b>                 | -2.046      |
| 5                                | zgc:110418 ( <i>kcnk6</i> ) | novel protein similar to vertebrate potassium inwardly-rectifying channel, subfamily K, member 6 | <b>Axial</b>                 | -2.030      |
| 6                                | <i>frzb</i>                 | frizzled-related protein                                                                         | <b>Axial</b>                 | +3.320      |
| 7                                | <i>ntla</i>                 | no tail-a                                                                                        | <b>Axial</b>                 | +2.225      |
| 8                                | <i>cav3</i>                 | caveolin 3                                                                                       | <b>Axial, Paraxial</b>       | -2.717      |
| 9                                | <i>wu:fd47f06 (guca2b)</i>  | novel protein similar to vertebrate guanylate cyclase activator 2b                               | Ectoderm                     | +2.095      |
| 8/9 (89 %) with axial expression |                             |                                                                                                  |                              |             |

**Supplementary Table 6. cFD vs. *ntla* cMO comparison at 9 hpf: 87 microarray hits grouped by cellular function and ranked by fold change.**

| Entry                               | Gene symbol                           | Gene description                                                                                         | Cellular function       | Fold change |
|-------------------------------------|---------------------------------------|----------------------------------------------------------------------------------------------------------|-------------------------|-------------|
| 1                                   | <i>hdr</i>                            | hematopoietic death receptor                                                                             | Apoptosis               | -2.773      |
| 2                                   | <i>fadd</i>                           | fas (tnfrsf6)-associated via death domain                                                                | Apoptosis               | -2.341      |
| 3                                   | <i>tnfaip6</i>                        | tumor necrosis factor, alpha-induced protein 6                                                           | Apoptosis               | -2.200      |
| 4                                   | <i>tnfrsfa</i>                        | tumor necrosis factor receptor superfamily, member a                                                     | Apoptosis               | -2.013      |
| 4/87 (5%) apoptosis                 |                                       |                                                                                                          |                         |             |
| 5                                   | <i>lrrc8da</i>                        | novel protein similar to vertebrate leucine rich repeat containing 8 family, member D alpha              | Cell adhesion/migration | -4.602      |
| 6                                   | <i>zgc:91787 (b3gnt7)</i>             | novel protein similar to vertebrate beta-3-galactosyltransferase                                         | Cell adhesion/migration | -4.215      |
| 7                                   | <i>kirrel3l</i>                       | kin of IRRE like 3 like                                                                                  | Cell adhesion/migration | -3.334      |
| 8                                   | <i>pak1</i>                           | P21/Cdc42/Rac1-activated kinase 1                                                                        | Cell adhesion/migration | -3.114      |
| 9                                   | <i>zgc:66052 (tagln3b)</i>            | novel protein similar to vertebrate transgelin 3                                                         | Cell adhesion/migration | -2.939      |
| 10                                  | <i>zgc:163023 (tspan4)</i>            | novel protein similar to vertebrate tetraspanin 4                                                        | Cell adhesion/migration | -2.460      |
| 11                                  | <i>itgb5</i>                          | integrin, beta 5                                                                                         | Cell adhesion/migration | -2.400      |
| 12                                  | <i>st3gal2l</i>                       | ST3 beta-galactoside alpha-2,3-sialyltransferase 2, like                                                 | Cell adhesion/migration | -2.321      |
| 13                                  | <i>hmcn1</i>                          | hemicentin 1                                                                                             | Cell adhesion/migration | -2.272      |
| 14                                  | <i>inka1a</i>                         | induced in neural crest by AP2, 1a                                                                       | Cell adhesion/migration | -2.170      |
| 10/87 (12%) cell adhesion/migration |                                       |                                                                                                          |                         |             |
| 15                                  | <i>si:ch211-215a10.5-001 (hpcal4)</i> | novel protein similar to vertebrate hippocalcin like 4                                                   | Cell signaling          | -6.543      |
| 16                                  | <i>LOC563543 (inpp5b)</i>             | novel protein similar to vertebrate inositol polyphosphate-5-phosphatase                                 | Cell signaling          | -6.093      |
| 17                                  | <i>notch1b</i>                        | notch homolog 1b                                                                                         | Cell signaling          | -5.524      |
| 18                                  | <i>wnt8a</i>                          | wingless-type MMTV integration site family, member 8a                                                    | Cell signaling          | -4.652      |
| 19                                  | <i>LOC566628 (pskh2)</i>              | novel protein similar to vertebrate protein serine kinase H2                                             | Cell signaling          | -4.616      |
| 20                                  | <i>pip5k1c</i>                        | phosphatidylinositol-4-phosphate 5-kinase, type I, gamma                                                 | Cell signaling          | -3.592      |
| 21                                  | <i>pde4ba</i>                         | cAMP-specific 3',5'-cyclic phosphodiesterase 4B alpha                                                    | Cell signaling          | -3.547      |
| 22                                  | <i>aldh1a2</i>                        | aldehyde dehydrogenase 1 family, member A2                                                               | Cell signaling          | -3.255      |
| 23                                  | <i>rgmb</i>                           | RGM domain family, member B                                                                              | Cell signaling          | -2.721      |
| 24                                  | <i>trpv4</i>                          | transient receptor potential cation channel, subfamily V, member 4                                       | Cell signaling          | -2.712      |
| 25                                  | <i>adora2ab</i>                       | adenosine receptor A2a.2                                                                                 | Cell signaling          | -2.677      |
| 26                                  | <i>zgc:153027 (esm1)</i>              | novel protein similar to vertebrate endothelial cell-specific molecule 1                                 | Cell signaling          | -2.637      |
| 27                                  | <i>kidins220a</i>                     | kinase D-interacting substance of 220 kDa                                                                | Cell signaling          | -2.603      |
| 28                                  | <i>zgc:92198 (camk2n2)</i>            | novel protein similar to vertebrate Ca <sup>2+</sup> /calmodulin-dependent protein kinase II inhibitor 2 | Cell signaling          | -2.367      |
| 29                                  | <i>wnt3l</i>                          | wingless-type MMTV integration site family, member 3 like                                                | Cell signaling          | -2.338      |
| 30                                  | <i>dlc</i>                            | deltaC                                                                                                   | Cell signaling          | -2.146      |

|                                |                                     |                                                                                                |                      |         |
|--------------------------------|-------------------------------------|------------------------------------------------------------------------------------------------|----------------------|---------|
| 31                             | <i>kitlga</i>                       | kit ligand a                                                                                   | Cell signaling       | -2.145  |
| 32                             | <i>kif1b</i>                        | kinesin family member 1B                                                                       | Cell signaling       | -2.085  |
| 33                             | <i>notch2</i>                       | notch homolog 2                                                                                | Cell signaling       | -2.072  |
| 34                             | <i>fgf24</i>                        | fibroblast growth factor 24                                                                    | Cell signaling       | -2.020  |
| 35                             | <i>zgc:165655</i>                   | novel pleckstrin domain protein                                                                | Cell signaling       | -2.009  |
| 36                             | <i>pdgfrb2</i>                      | platelet-derived growth factor receptor beta 1.2 fragment                                      | Cell signaling       | +2.442  |
| 22/87 (25%) cell signaling     |                                     |                                                                                                |                      |         |
| 37                             | <i>plp2</i>                         | proteolipid protein 2                                                                          | Endocytosis          | -4.036  |
| 38                             | <i>sort1b</i>                       | sortilin 1, like                                                                               | Endocytosis          | -2.284  |
| 2/87 (2%) endocytosis          |                                     |                                                                                                |                      |         |
| 39                             | <i>col8a1a</i>                      | collagen, type VIII, alpha 1                                                                   | Extracellular matrix | -4.113  |
| 40                             | <i>plod1a</i>                       | lysyl hydroxylase 1                                                                            | Extracellular matrix | -3.848  |
| 41                             | <i>cpn1</i>                         | carboxypeptidase N, polypeptide 1                                                              | Extracellular matrix | -3.379  |
| 42                             | <i>p4ha1</i>                        | procollagen-proline, 2-oxoglutarate 4-dioxygenase (proline 4-hydroxylase), alpha polypeptide I | Extracellular matrix | -2.512  |
| 4/87 (5%) extracellular matrix |                                     |                                                                                                |                      |         |
| 43                             | <i>lhx1a</i>                        | LIM-homeobox 1a                                                                                | Gene expression      | -6.092  |
| 44                             | <i>snai2</i>                        | snail homolog 2                                                                                | Gene expression      | -5.700  |
| 45                             | <i>si:dkey-49o11.4 (tbx3l)</i>      | novel protein similar to vertebrate t-box 3                                                    | Gene expression      | -5.072  |
| 46                             | <i>myod1</i>                        | myogenic determination factor 1                                                                | Gene expression      | -4.290  |
| 47                             | <i>rbm38</i>                        | RNA binding motif protein 38                                                                   | Gene expression      | -3.483  |
| 48                             | <i>mnx1</i>                         | motor neuron and pancreas homeobox 1                                                           | Gene expression      | -3.252  |
| 49                             | <i>hmbox1b</i>                      | similar to homeobox containing 1                                                               | Gene expression      | -3.133  |
| 50                             | <i>tbx6</i>                         | T-box gene 6                                                                                   | Gene expression      | -2.919  |
| 51                             | <i>myf5</i>                         | myogenic factor 5                                                                              | Gene expression      | -2.788  |
| 52                             | <i>si:dkey-195c14.1 (sall3l)</i>    | novel protein similar to vertebrate sal-like 3                                                 | Gene expression      | -2.552  |
| 53                             | <i>smyd1b</i>                       | SET and MYND domain containing 1b                                                              | Gene expression      | -2.532  |
| 54                             | <i>her1</i>                         | hairy-related 1                                                                                | Gene expression      | -2.529  |
| 55                             | <i>mesp2</i>                        | mesoderm posterior 2 homolog                                                                   | Gene expression      | -2.333  |
| 56                             | <i>twist2</i>                       | twist 2                                                                                        | Gene expression      | -2.333  |
| 57                             | <i>irx3a</i>                        | iroquois homeobox protein 3a                                                                   | Gene expression      | -2.242  |
| 58                             | <i>sall1a</i>                       | sal-like 1a                                                                                    | Gene expression      | -2.206  |
| 59                             | <i>meis4.1a</i>                     | myeloid ecotropic viral integration site 4.1a                                                  | Gene expression      | -2.155  |
| 60                             | <i>prickle2</i>                     | prickle-like 2                                                                                 | Gene expression      | -2.135  |
| 61                             | <i>si:ch211-285f17.1 (KIAA1217)</i> | novel protein similar to vertebrate sickle tail protein homolog                                | Gene expression      | -2.0300 |
| 62                             | <i>id:ibd2573 (creb3l1)</i>         | novel protein similar to vertebrate cAMP responsive element binding protein 3-like 1           | Gene expression      | -2.021  |

|                              |                                        |                                                                             |                              |         |
|------------------------------|----------------------------------------|-----------------------------------------------------------------------------|------------------------------|---------|
| 63                           | <i>hbp1</i>                            | HMG box-containing protein 1                                                | Gene expression              | +2.037  |
| 64                           | <i>rbms3</i>                           | RNA binding motif, single stranded interacting protein                      | Gene expression              | +2.095  |
| 22/87 (25%) gene expression  |                                        |                                                                             |                              |         |
| 65                           | <i>hfe2</i>                            | hemochromatosis type 2                                                      | Other (homeostasis)          | -2.485  |
| 66                           | <i>lipg</i>                            | lipase, endothelial                                                         | Other (homeostasis)          | -2.429  |
| 67                           | <i>nmnat2</i>                          | nicotinamide nucleotide adenyltransferase 2                                 | Other (homeostasis)          | +2.027  |
| 68                           | <i>atp1a1b</i>                         | ATPase, Na <sup>+</sup> /K <sup>+</sup> transporting, alpha 1b polypeptide  | Other (membrane transporter) | -4.371  |
| 69                           | <i>abcc6b</i>                          | ATP-binding cassette, sub-family C, member 6b                               | Other (membrane transporter) | -3.344  |
| 70                           | <i>lamp1</i>                           | lysosomal-associated membrane protein 1                                     | Other (protein homeostasis)  | -3.426  |
| 71                           | <i>hspa12a</i>                         | heat shock 70 kDa protein 12A                                               | Other (protein homeostasis)  | -2.660  |
| 72                           | <i>wwp2</i>                            | WW domain containing E3 ubiquitin protein ligase 2                          | Other (protein homeostasis)  | -2.121  |
| 73                           | <i>ube2e3</i>                          | ubiquitin-conjugating enzyme E2E 3                                          | Other (protein homeostasis)  | -2.120  |
| 9/87 (10%) other             |                                        |                                                                             |                              |         |
| 74                           | <i>ppargc1a</i>                        | peroxisome proliferator activated receptor gamma coactivator 1 alpha - like | Sarcomere assembly           | -3.026  |
| 75                           | <i>unc45b</i>                          | homolog of <i>C. elegans</i> unc-45B                                        | Sarcomere assembly           | -3.013  |
| 76                           | <i>ttna</i>                            | titin a                                                                     | Sarcomere assembly           | -2.415  |
| 77                           | <i>actn2</i>                           | actinin, alpha 2                                                            | Sarcomere assembly           | -2.384  |
| 78                           | <i>ttnb</i>                            | titin b                                                                     | Sarcomere assembly           | -2.327  |
| 79                           | <i>myom3</i>                           | myomesin family, member 3                                                   | Sarcomere assembly           | +2.002  |
| 6/87 (7%) sarcomere assembly |                                        |                                                                             |                              |         |
| 80                           | <i>si:dkey-146l2.1-001 (ankrd15)</i>   | novel protein similar to vertebrate ankyrin repeat domain 15                | Unknown                      | -4.281  |
| 81                           | <i>ribc1</i>                           | RIB43A domain with coiled-coils 1                                           | Unknown                      | -3.614  |
| 82                           | <i>dopey2</i>                          | dopey family member 2                                                       | Unknown                      | -3.341  |
| 83                           | <i>caskin1</i>                         | CASK-interacting protein 1                                                  | Unknown                      | -3.206  |
| 84                           | <i>tacc2</i>                           | transforming, acidic coiled-coil containing protein 2                       | Unknown                      | -2.693  |
| 85                           | <i>lrch2</i>                           | leucine-rich repeats and calponin homology (CH) domain containing 2         | Unknown                      | -2.431  |
| 86                           | <i>zgc:66433 (KIAA1211)</i>            | novel protein similar to vertebrate uncharacterized protein KIAA1211        | Unknown                      | -2.200  |
| 87                           | <i>ENSDARG0000006307 5 (c20orf117)</i> | novel protein similar to vertebrate uncharacterized protein c20orf117       | Unknown                      | -2.1200 |
| 8/87 (9%) unknown            |                                        |                                                                             |                              |         |

**Supplementary Table 7. cFD vs. *ntl*a cMO + cFD comparison at 16 hpf: 12 microarray hits grouped by cellular function and ranked by fold change.**

| Entry                             | Gene symbol                       | Gene description                                                                                 | Cellular function       | Fold change |
|-----------------------------------|-----------------------------------|--------------------------------------------------------------------------------------------------|-------------------------|-------------|
| 1                                 | <i>tspan7b</i>                    | tetraspanin 7b                                                                                   | Cell adhesion/migration | -2.318      |
| 1/12 (8%) cell adhesion/migration |                                   |                                                                                                  |                         |             |
| 2                                 | <i>si:dkey-205o12.2 (prk1)</i>    | novel protein similar to vertebrate pim oncogene related kinase 1                                | Cell signaling          | -2.073      |
| 3                                 | <i>frzb</i>                       | frizzled-related protein                                                                         | Cell signaling          | +3.320      |
| 4                                 | <i>wu:fd47f06 (guca2b)</i>        | novel protein similar to vertebrate guanylate cyclase activator 2b                               | Cell signaling          | +2.095      |
| 3/12 (25%) cell signaling         |                                   |                                                                                                  |                         |             |
| 5                                 | <i>LOC795255 (slc38a8)</i>        | novel protein similar to vertebrate soluble carrier family 38 protein                            | Endocytosis             | -4.917      |
| 6                                 | <i>cav3</i>                       | caveolin 3                                                                                       | Endocytosis             | -2.717      |
| 7                                 | <i>ptrfb</i>                      | polymerase I and transcript release factor b                                                     | Endocytosis             | -2.046      |
| 3/12 (25%) endocytosis            |                                   |                                                                                                  |                         |             |
| 8                                 | <i>znf385b</i>                    | zinc finger protein 385b                                                                         | Gene expression         | -2.357      |
| 9                                 | <i>si:dkeyp-122e7.1 (znf804a)</i> | novel protein similar to vertebrate zinc finger 804a                                             | Gene expression         | -2.051      |
| 10                                | <i>zgc:174919</i>                 | novel protein containing zinc finger domain                                                      | Gene expression         | -2.039      |
| 11                                | <i>ntl</i> a                      | no tail-a                                                                                        | Gene expression         | +2.225      |
| 4/12 (33 %) gene expression       |                                   |                                                                                                  |                         |             |
| 12                                | <i>zgc:110418 (kcnk6)</i>         | novel protein similar to vertebrate potassium inwardly-rectifying channel, subfamily K, member 6 | Membrane transporter    | -2.030      |
| 1/12 (8%) other                   |                                   |                                                                                                  |                         |             |



**Supplementary Table 8. cFD vs. *ntla* cMO + cFD comparison at 9 hpf: 34 microarray hits with reported loss-of-function studies, grouped by their expression domain at 10 hpf and ranked by phenotype and fold change.**

\*Expression domains highlight in bold font were confirmed to be *Ntla*-dependent by *in situ* hybridization.

\*\*Loss-of-function methods highlighted in bold font were performed in this study.

\*\*\*Phenotypes related to mesodermal patterning are indicated. Those highlighted in bold font were investigated in this study.

| Entry                                                  | Gene symbol                           | Gene description                                                         | Expression domain at 10 hpf* | Fold Change | Loss-of-function method** | Mesodermal defects***         |
|--------------------------------------------------------|---------------------------------------|--------------------------------------------------------------------------|------------------------------|-------------|---------------------------|-------------------------------|
| 1                                                      | <i>pak1</i>                           | P21/Cdc42/Rac1-activated kinase 1                                        | <b>Axial</b>                 | -3.114      | Morpholino                | Gastrulation <sup>5</sup>     |
| 2                                                      | <i>irx3a</i>                          | iroquois homeobox protein 3a                                             | Axial                        | -2.242      | Morpholino                | Gastrulation <sup>6</sup>     |
| 3                                                      | <i>prickle2</i>                       | prickle-like 2                                                           | <b>Axial</b>                 | -2.135      | Morpholino                | Gastrulation <sup>7</sup>     |
| 4                                                      | <i>col8a1a</i>                        | collagen, type VIII, alpha 1                                             | <b>Axial</b>                 | -4.113      | Mutant, <b>Morpholino</b> | <b>Notochord</b> <sup>8</sup> |
| 5                                                      | <i>mnx1</i>                           | motor neuron and pancreas homeobox 1                                     | <b>Axial</b>                 | -3.252      | <b>Morpholino</b>         | <b>Notochord, Muscle</b>      |
| 6                                                      | <i>si:ch211-215a10.5-001 (hpcal4)</i> | novel protein similar to vertebrate hippocalcin like 4                   | <b>Axial</b>                 | -6.543      | <b>Morpholino</b>         | <b>None</b>                   |
| 7                                                      | <i>LOC563543 (inpp5b)</i>             | novel protein similar to vertebrate inositol polyphosphate-5-phosphatase | <b>Axial</b>                 | -6.093      | <b>Morpholino</b>         | <b>None</b>                   |
| 8                                                      | <i>snai2</i>                          | snail homolog 2                                                          | <b>Axial</b>                 | -5.700      | <b>Morpholino</b>         | <b>None</b>                   |
| 9                                                      | <i>hdr</i>                            | hematopoietic death receptor                                             | Axial                        | -2.773      | Morpholino                | None <sup>9</sup>             |
| 10                                                     | <i>trpv4</i>                          | transient receptor potential cation channel, subfamily V, member 4       | Axial                        | -2.712      | Mutant, Morpholino        | None <sup>10</sup>            |
| 11                                                     | <i>tacc2</i>                          | transforming, acidic coiled-coil containing protein 2                    | <b>Axial</b>                 | -2.693      | <b>Morpholino</b>         | <b>None</b>                   |
| 12                                                     | <i>fadd</i>                           | fas (tnfrsf6)-associated via death domain                                | Axial                        | -2.341      | Morpholino                | None <sup>9</sup>             |
| 13                                                     | <i>hmcn1</i>                          | hemicentin 1                                                             | Axial                        | -2.272      | Mutant                    | None <sup>11,12</sup>         |
| 14                                                     | <i>sall1a</i>                         | sal-like 1a                                                              | Axial                        | -2.206      | Morpholino                | None <sup>13</sup>            |
| 15                                                     | <i>inka1a</i>                         | induced in neural crest by AP2, 1a                                       | Axial                        | -2.170      | Mutant, Morpholino        | None <sup>14</sup>            |
| 16                                                     | <i>tnfrsfa</i>                        | tumor necrosis factor receptor superfamily, member a                     | Axial                        | -2.013      | Morpholino                | None <sup>9</sup>             |
| 17                                                     | <i>kirrel3l</i>                       | kin of IRRE like 3 like                                                  | <b>Axial, Other</b>          | -3.334      | Morpholino                | Muscle <sup>15</sup>          |
| 18                                                     | <i>lhx1a</i>                          | LIM-homeobox 1a                                                          | <b>Axial, Other</b>          | -6.092      | <b>Morpholino</b>         | <b>None</b>                   |
| 19                                                     | <i>notch1b</i>                        | notch homolog 1b                                                         | <b>Axial, Other</b>          | -5.524      | Morpholino                | None <sup>16-18</sup>         |
| 2/19 (10%) with axial expression had notochord defects |                                       |                                                                          |                              |             |                           |                               |
| 20                                                     | <i>myod1</i>                          | myogenic determination factor 1                                          | <b>Paraxial</b>              | -4.290      | Mutant, Morpholino        | Muscle <sup>19</sup>          |
| 21                                                     | <i>unc45b</i>                         | homolog of <i>C. elegans</i> unc-45B                                     | <b>Paraxial</b>              | -3.013      | Mutant, Morpholino        | Muscle <sup>20</sup>          |

|                                                        |                  |                                                                             |                          |        |                    |                                      |
|--------------------------------------------------------|------------------|-----------------------------------------------------------------------------|--------------------------|--------|--------------------|--------------------------------------|
| 22                                                     | <i>myf5</i>      | myogenic factor 5                                                           | Paraxial                 | -2.788 | Mutant, Morpholino | Muscle <sup>21</sup>                 |
| 23                                                     | <i>smyd1b</i>    | SET and MYND domain containing 1b                                           | Paraxial                 | -2.532 | Morpholino         | Muscle <sup>22</sup>                 |
| 24                                                     | <i>ttna</i>      | titin a                                                                     | Paraxial                 | -2.415 | Mutant, Morpholino | Muscle <sup>23</sup>                 |
| 25                                                     | <i>ttnb</i>      | titin b                                                                     | Paraxial                 | -2.327 | Morpholino         | Muscle <sup>23</sup>                 |
| 26                                                     | <i>dlc</i>       | deltaC                                                                      | Paraxial                 | -2.146 | Mutant, Morpholino | Muscle <sup>24</sup>                 |
| 27                                                     | <i>aldh1a2</i>   | aldehyde dehydrogenase 1 family, member A2                                  | <b>Paraxial</b>          | -3.255 | Mutant, Morpholino | No <sup>25,26</sup>                  |
| 28                                                     | <i>meis4.1a</i>  | myeloid ecotropic viral integration site 4.1a                               | Paraxial                 | -2.155 | Morpholino         | None <sup>27</sup>                   |
| 29                                                     | <i>notch2</i>    | notch homolog 2                                                             | Paraxial                 | -2.072 | Morpholino         | None <sup>16</sup>                   |
| 7/10 (70%) with paraxial expression had muscle defects |                  |                                                                             |                          |        |                    |                                      |
| 30                                                     | <i>wnt8a</i>     | wingless-type MMTV integration site family, member 8a                       | <b>Tailbud, Other</b>    | -4.652 | Mutant, Morpholino | Notochord, Mesoderm <sup>28-30</sup> |
| 31                                                     | <i>wnt3l</i>     | wingless-type MMTV integration site family, member 3 like                   | <b>Tailbud, Paraxial</b> | -2.338 | Morpholino         | Mesoderm <sup>29,30</sup>            |
| 32                                                     | <i>fgf24</i>     | fibroblast growth factor 24                                                 | Tailbud, Paraxial        | -2.020 | Mutant, Morpholino | Mesoderm <sup>31</sup>               |
| 33                                                     | <i>ppargc1a1</i> | peroxisome proliferator activated receptor gamma coactivator 1 alpha - like | Paraxial                 | -3.026 | Morpholino         | Muscle <sup>32</sup>                 |
| 34                                                     | <i>her1</i>      | hairy-related 1                                                             | <b>Tailbud, Paraxial</b> | -2.529 | Mutant, Morpholino | Muscle <sup>33</sup>                 |
| 3/5 (60%) with tailbud expression had mesoderm defects |                  |                                                                             |                          |        |                    |                                      |

**Supplementary Table 9. cFD vs. *ntla* cMO + cFD comparison at 16 hpf: 4 microarray hits with reported loss-of-function studies, grouped by their expression domain at 16 hpf and ranked by fold change.**

\*Expression domains highlighted in bold font were confirmed to be *Ntla*-dependent by *in situ* hybridization.

\*\*Phenotypes highlighted in bold font were investigated in this study.

| Entry | Gene symbol                | Gene description                                                      | Expression domain at 16 hpf*    | Fold Change | Loss-of-function method | Notochord defects**      |
|-------|----------------------------|-----------------------------------------------------------------------|---------------------------------|-------------|-------------------------|--------------------------|
| 1     | <i>LOC795255 (slc38a8)</i> | novel protein similar to vertebrate soluble carrier family 38 protein | <b>Chordamesoderm</b>           | -4.917      | Morpholino              | <b>Yes</b>               |
| 2     | <i>znf385b</i>             | zinc finger protein 385b                                              | <b>Chordamesoderm</b>           | -2.357      | Morpholino              | <b>Yes</b>               |
| 3     | <i>ptrfb</i>               | polymerase I and transcript release factor b                          | <b>Chordamesoderm</b>           | -2.046      | Morpholino              | <b>Yes</b> <sup>34</sup> |
| 4     | <i>cav3</i>                | caveolin 3                                                            | <b>Chordamesoderm, Paraxial</b> | -2.717      | Morpholino              | <b>Yes</b> <sup>35</sup> |

### Supplementary Table 10. MO sequences and doses.

\*Bases complementary to start codons are underlined, where appropriate.

\*\*Intron/exon assignments are based upon the zebrafish genome assembly Zv8, gene build 59 (May 2010).

| MO                                        | Sequence*                                   | Targeted region**        | Dose (per embryo)              | Functional validation                      |
|-------------------------------------------|---------------------------------------------|--------------------------|--------------------------------|--------------------------------------------|
| <i>cav3</i> MO                            | CGTTAGTGTGTACTGGTCCGCCAT                    | translational start site | 3 ng + 4.5 ng <i>tp53</i> MO   | previously reported morphant <sup>35</sup> |
| <i>col8a1a</i> MO                         | CCGTAGGAGAAGATAATCTCAAGGA                   | translational start site | 6 ng                           | mutant phenocopy <sup>8</sup>              |
| <i>lhx1a</i> MO1                          | CCCGCACAGTGGACCATCGTCTTTG                   | translational start site | 18 ng                          |                                            |
| <i>lhx1a</i> MO2                          | GACCATCGTCTTTGGATGTGCTCCC                   | translational start site | 8 ng                           |                                            |
| <i>LOC563543 (inpp5b)</i>                 | CTGGAAACTACCGGAGGAAAACACA                   | splice - i9e10           | 3 ng + 4.5 ng <i>tp53</i> MO   | missplicing – Supp. Fig. 6C                |
| <i>LOC795255 (slc38a8)</i> MO1            | TGGCATAGCCTCTAACACACCTGGT                   | splice - e3i3            | 6 ng                           | missplicing – Supp. Fig. 8G                |
| <i>LOC795255 (slc38a8)</i> MO2            | AGTTCCTCCATCCTCAGCGCCTCAA                   | translational start site | 1.5 ng + 2.2 ng <i>tp53</i> MO | phenocopy of MO1                           |
| <i>mnx1</i> MO1                           | GCCTGGCCTGCATGGAGAATTTTAA                   | splice - i1e2            | 9 ng                           | missplicing – Supp. Fig. 5D                |
| <i>mnx1</i> MO2                           | AAAAGAAAGGTTTACCTGCGTCTCT                   | splice - e2i2            | 6 ng                           | missplicing – Supp. Fig. 5D                |
| <i>ntlA</i> cMO                           | GACTTGAGGCAGACATATTTCCGAT-linker-GCCTCAAGTC | cMO                      | 1.5 ng                         | mutant phenocopy <sup>36,37</sup>          |
| <i>ntlA</i> MO                            | GACTTGAGGCAGACATATTTCCGAT                   | translational start site | 1 ng                           | mutant phenocopy <sup>36,37</sup>          |
| <i>ptrfb</i> MO                           | GACGGCTGTCTTCAATCACCTCCAT                   | translational start site | 6 ng                           | previously reported morphant <sup>34</sup> |
| <i>si:ch211-215a10.5-001 (hpcal4)</i> MO1 | GTTTTCCCATCTCTACACCTCACTG                   | translational start site | 6 ng + 9 ng <i>tp53</i> MO     |                                            |
| <i>si:ch211-215a10.5-001 (hpcal4)</i> MO2 | GCTTGCTGTTGTGTTTTCCCATCTC                   | translational start site | 2 ng + 3 ng <i>tp53</i> MO     |                                            |
| <i>snai2</i>                              | ATACATGTCATTTTCTCACCCGTGT                   | splice - e2i2            | 3 ng                           | missplicing – Supp. Fig. 6E                |
| <i>tacc2</i>                              | TCCATCTTTTGTCTCTTACCATCA                    | splice – e7i7            | 1 ng + 2 ng <i>tp53</i> MO     | missplicing – Supp. Fig. 6F                |
| <i>tp53</i> MO                            | GCGCCATTGCTTTGCAAGAATTG                     | translational start site | –                              | previously reported morphant <sup>38</sup> |
| <i>znf385b</i> MO1                        | TTCTGGAGGTCTTACCTTGACTGCT                   | splice - e2i2            | 3 ng + 4.5 ng <i>tp53</i> MO   | missplicing – Supp. Fig. 8K                |
| <i>znf385b</i> MO2                        | TGGCTCTACAAAGGAGAACAATGA                    | splice - i4e5            | 3 ng + 4.5 ng <i>tp53</i> MO   | missplicing – Supp. Fig. 8K                |

**Supplementary Table 11. Phenotype statistics for morpholino experiments in order of presentation.**

| Figure | Panel     | Phenotypic criteria                                                   | Total number of embryos | Number with phenotype | % Penetrance |
|--------|-----------|-----------------------------------------------------------------------|-------------------------|-----------------------|--------------|
| 1      | c, top    | Fluorescent notochord and medial floor plate                          | 20                      | 20                    | 100          |
| 1      | c, bottom | Fluorescent medial floor plate alone                                  | 26                      | 23                    | 88           |
| 1      | d, top    | Fluorescent notochord and neural tube                                 | 29                      | 29                    | 100          |
| 1      | d, bottom | Fluorescent, incompletely vacuolated notochord and neural tube        | 24                      | 24                    | 100          |
| 2      | b         | Axial and ventral mesoderm expression of <i>lhx1a</i>                 | 21                      | 21                    | 100          |
| 2      | c         | Loss of axial expression of <i>lhx1a</i>                              | 20                      | 20                    | 100          |
| 2      | d         | Axial expression of <i>mnx1</i>                                       | 18                      | 18                    | 100          |
| 2      | e         | Loss of axial expression of <i>mnx1</i>                               | 21                      | 21                    | 100          |
| 2      | f         | Tailbud expression of <i>rbm38</i>                                    | 22                      | 22                    | 100          |
| 2      | g         | Loss of axial tailbud expression of <i>rbm38</i>                      | 21                      | 21                    | 100          |
| 2      | h         | Adaxial expression of <i>unc45b</i>                                   | 17                      | 17                    | 100          |
| 2      | i         | Reduced adaxial expression of <i>unc45b</i>                           | 23                      | 20                    | 87           |
| 2      | j         | Chordamesodermal and somitic expression of <i>cav3</i>                | 10                      | 10                    | 100          |
| 2      | k         | Reduced chordamesodermal expression of <i>cav3</i>                    | 10                      | 8                     | 80           |
| 2      | l         | Chordamesodermal expression of <i>tspan7b</i>                         | 12                      | 12                    | 100          |
| 2      | m         | Reduced chordamesodermal expression of <i>tspan7b</i>                 | 12                      | 12                    | 100          |
| 2      | n         | Chordamesodermal expression of <i>slc38a8</i>                         | 12                      | 12                    | 100          |
| 2      | o         | Reduced chordamesodermal expression of <i>slc38a8</i>                 | 10                      | 10                    | 100          |
| 2      | p         | Chordamesodermal expression of <i>znf385b</i>                         | 16                      | 15                    | 94           |
| 2      | q         | Reduced chordamesodermal expression of <i>znf385b</i>                 | 10                      | 8                     | 80           |
| 3      | c         | Undulating notochord                                                  | 37                      | 37                    | 100          |
| 3      | d         | Wildtype-like notochord                                               | 26                      | 26                    | 100          |
| 3      | f         | Somite patterning defects                                             | 24                      | 24                    | 100          |
| 3      | g         | Somite patterning defects                                             | 26                      | 26                    | 100          |
| 3      | h         | Axial expression of <i>shha</i>                                       | 20                      | 20                    | 100          |
| 3      | i         | Axial expression of <i>shha</i>                                       | 17                      | 17                    | 100          |
| 3      | j         | Axial expression of <i>ihhb</i>                                       | 20                      | 20                    | 100          |
| 3      | k         | Reduced axial expression of <i>ihhb</i>                               | 20                      | 20                    | 100          |
| 3      | l         | Adaxial expression of <i>ptc1</i>                                     | 21                      | 18                    | 86           |
| 3      | m         | Adaxial expression of <i>ptc1</i>                                     | 18                      | 16                    | 89           |
| 3      | o         | Incomplete notochord vacuolization                                    | 16                      | 12                    | 75           |
| 3      | p         | Incomplete notochord vacuolization                                    | 18                      | 9                     | 50           |
| S1     | 6 hpf     | Ntla expression in the germ ring at wildtype level                    | 8                       | 8                     | 100          |
| S1     | 7 hpf     | Ntla expression in the germ ring and axial mesoderm at wildtype level | 8                       | 6                     | 75           |

|    |                      |                                                                             |    |    |     |
|----|----------------------|-----------------------------------------------------------------------------|----|----|-----|
| S1 | 8 hpf                | Ntla expression in axial mesoderm is reduced where co-localized with FD     | 8  | 8  | 100 |
| S2 | 12 hpf               | Ntla expression in the chordamesoderm at wildtype level                     | 8  | 8  | 100 |
| S2 | 14 hpf               | Ntla expression in the chordamesoderm at nearly wildtype level              | 6  | 5  | 100 |
| S2 | 16 hpf               | Ntla expression in the chordamesoderm is reduced where co-localized with FD | 7  | 7  | 100 |
| S3 | <i>aldh1a2</i> , WT  | Paraxial expression                                                         | 18 | 18 | 100 |
| S3 | <i>aldh1a2</i> , MO  | Reduced paraxial expression                                                 | 21 | 16 | 76  |
| S3 | <i>b3gnt7</i> , WT   | Axial expression                                                            | 34 | 34 | 100 |
| S3 | <i>b3gnt7</i> , MO   | Loss of axial expression                                                    | 33 | 33 | 100 |
| S3 | <i>col8a1a</i> , WT  | Axial expression                                                            | 22 | 21 | 95  |
| S3 | <i>col8a1a</i> , MO  | Loss of axial expression                                                    | 25 | 22 | 88  |
| S3 | <i>her1</i> , WT     | Tailbud and paraxial expression                                             | 23 | 18 | 78  |
| S3 | <i>her1</i> , MO     | Reduced tailbud expression                                                  | 22 | 22 | 100 |
| S3 | <i>hpcal4</i> , WT   | Axial expression                                                            | 18 | 18 | 100 |
| S3 | <i>hpcal4</i> , MO   | Loss of axial expression                                                    | 16 | 16 | 100 |
| S3 | <i>inpp5b</i> , WT   | Axial expression                                                            | 18 | 18 | 100 |
| S3 | <i>inpp5b</i> , MO   | Loss of axial expression                                                    | 22 | 22 | 100 |
| S3 | <i>kirrel3l</i> , WT | Axial and anterior expression                                               | 22 | 22 | 100 |
| S3 | <i>kirrel3l</i> , MO | Loss of axial expression                                                    | 37 | 37 | 100 |
| S3 | <i>lhx1a</i> , WT    | Axial and lateral expression                                                | 18 | 14 | 78  |
| S3 | <i>lhx1a</i> , MO    | Loss of axial expression                                                    | 20 | 20 | 100 |
| S3 | <i>lrch2</i> , WT    | Axial expression                                                            | 22 | 20 | 91  |
| S3 | <i>lrch2</i> , MO    | Loss of axial expression                                                    | 20 | 20 | 100 |
| S3 | <i>lrrc8da</i> , WT  | Axial expression                                                            | 20 | 18 | 90  |
| S3 | <i>lrrc8da</i> , MO  | Loss of axial expression                                                    | 21 | 20 | 95  |
| S3 | <i>mnx1</i> , WT     | Axial expression                                                            | 18 | 17 | 94  |
| S3 | <i>mnx1</i> , MO     | Loss of axial expression                                                    | 21 | 21 | 100 |
| S3 | <i>myod1</i> , WT    | Adaxial expression                                                          | 20 | 20 | 100 |
| S3 | <i>myod1</i> , MO    | Reduced adaxial expression                                                  | 28 | 28 | 100 |
| S3 | <i>notch1b</i> , WT  | Axial, adaxial, tailbud, and anterior expression                            | 19 | 19 | 100 |
| S3 | <i>notch1b</i> , MO  | Loss of axial expression                                                    | 14 | 14 | 100 |
| S3 | <i>p4ha1</i> , WT    | Axial expression                                                            | 21 | 20 | 95  |
| S3 | <i>p4ha1</i> , MO    | Loss of axial expression                                                    | 22 | 22 | 100 |
| S3 | <i>pak1</i> , WT     | Axial expression                                                            | 21 | 20 | 95  |
| S3 | <i>pak1</i> , MO     | Loss of axial expression                                                    | 23 | 23 | 100 |
| S3 | <i>plod1a</i> , WT   | Axial expression                                                            | 19 | 19 | 100 |
| S3 | <i>plod1a</i> , MO   | Loss of axial expression                                                    | 33 | 33 | 100 |
| S3 | <i>prickle2</i> , WT | Axial expression                                                            | 17 | 17 | 100 |
| S3 | <i>prickle2</i> , MO | Loss of axial expression                                                    | 35 | 33 | 94  |
| S3 | <i>pskh2</i> , WT    | Axial expression                                                            | 24 | 24 | 100 |

|    |                        |                                         |    |    |     |
|----|------------------------|-----------------------------------------|----|----|-----|
| S3 | <i>pskh2</i> , MO      | Loss of axial expression                | 24 | 22 | 92  |
| S3 | <i>rbm38</i> , WT      | Tailbud expression                      | 22 | 22 | 100 |
| S3 | <i>rbm38</i> , MO      | Reduced tailbud expression              | 21 | 21 | 100 |
| S3 | <i>snai2</i> , WT      | Axial expression                        | 17 | 17 | 100 |
| S3 | <i>snai2</i> , MO      | Loss of axial expression                | 19 | 18 | 95  |
| S3 | <i>tacc2</i> , WT      | Axial expression                        | 18 | 17 | 94  |
| S3 | <i>tacc2</i> , MO      | Loss of axial expression                | 17 | 17 | 100 |
| S3 | <i>tbx6</i> , WT       | Paraxial expression                     | 19 | 19 | 100 |
| S3 | <i>tbx6</i> , MO       | Reduced paraxial expression             | 21 | 21 | 100 |
| S3 | <i>unc45b</i> , WT     | Adaxial expression                      | 17 | 17 | 100 |
| S3 | <i>unc45b</i> , MO     | Reduced adaxial expression              | 23 | 20 | 87  |
| S3 | <i>wnt8a</i> , WT      | Tailbud expression                      | 19 | 19 | 100 |
| S3 | <i>wnt8a</i> , MO      | Reduced tailbud expression              | 13 | 11 | 85  |
| S4 | <i>cav3</i> , WT       | Chordamesodermal and somitic expression | 9  | 9  | 100 |
| S4 | <i>cav3</i> , no UV    | Chordamesodermal and somitic expression | 10 | 10 | 100 |
| S4 | <i>cav3</i> , UV       | Reduced chordamesodermal expression     | 10 | 8  | 80  |
| S4 | <i>frzb</i> , WT       | No expression                           | 11 | 11 | 100 |
| S4 | <i>frzb</i> , no UV    | No expression                           | 9  | 6  | 67  |
| S4 | <i>frzb</i> , UV       | Chordamesodermal expression             | 9  | 9  | 100 |
| S4 | <i>guca2b</i> , WT     | Ectodermal expression                   | 11 | 11 | 100 |
| S4 | <i>guca2b</i> , no UV  | Ectodermal expression                   | 13 | 13 | 100 |
| S4 | <i>guca2b</i> , UV     | Ectodermal expression                   | 10 | 10 | 100 |
| S4 | <i>kcnk6</i> , WT      | Chordamesodermal expression             | 18 | 18 | 100 |
| S4 | <i>kcnk6</i> , no UV   | Chordamesodermal expression             | 12 | 12 | 100 |
| S4 | <i>kcnk6</i> , UV      | Reduced chordamesodermal expression     | 12 | 12 | 100 |
| S4 | <i>ntla</i> , WT       | Chordamesodermal expression             | 6  | 6  | 100 |
| S4 | <i>ntla</i> , no UV    | Chordamesodermal expression             | 13 | 13 | 100 |
| S4 | <i>ntla</i> , UV       | Increased chordamesodermal expression   | 6  | 6  | 100 |
| S4 | <i>ptrfb</i> , WT      | Chordamesodermal expression             | 10 | 10 | 100 |
| S4 | <i>ptrfb</i> , no UV   | Chordamesodermal expression             | 12 | 11 | 92  |
| S4 | <i>ptrfb</i> , UV      | Reduced chordamesodermal expression     | 8  | 8  | 100 |
| S4 | <i>slc38a8</i> , WT    | Chordamesodermal expression             | 9  | 9  | 100 |
| S4 | <i>slc38a8</i> , no UV | Chordamesodermal expression             | 12 | 12 | 100 |
| S4 | <i>slc38a8</i> , UV    | Reduced chordamesodermal expression     | 10 | 10 | 100 |
| S4 | <i>tspan7b</i> , WT    | Chordamesodermal expression             | 21 | 21 | 100 |
| S4 | <i>tspan7b</i> , no UV | Chordamesodermal expression             | 12 | 12 | 100 |
| S4 | <i>tspan7b</i> , UV    | Reduced chordamesodermal expression     | 12 | 12 | 100 |
| S4 | <i>znf385b</i> , WT    | Chordamesodermal expression             | 22 | 22 | 100 |
| S4 | <i>znf385b</i> , no UV | Chordamesodermal expression             | 16 | 15 | 94  |

|    |                     |                                                 |    |    |     |
|----|---------------------|-------------------------------------------------|----|----|-----|
| S4 | <i>znf385b</i> , UV | Reduced chordamesodermal expression             | 19 | 15 | 79  |
| S5 | b                   | Somite patterning defects                       | 13 | 11 | 85  |
| S5 | c                   | Somite patterning defects                       | 21 | 19 | 90  |
| S5 | e                   | U-shaped somites and ventral body curvature     | 17 | 17 | 100 |
| S5 | f                   | Somite patterning defects                       | 24 | 24 | 100 |
| S6 | b, MO1              | Ventral body curvature                          | 24 | 19 | 79  |
| S6 | b, MO2              | Ventral body curvature                          | 19 | 11 | 58  |
| S6 | c                   | Mild necrosis throughout embryo                 | 15 | 15 | 100 |
| S6 | d, MO1              | Wildtype-like morphology                        | 45 | 45 | 100 |
| S6 | d, MO2              | Ventral body curvature                          | 51 | 42 | 82  |
| S6 | e                   | Wildtype-like morphology                        | 17 | 17 | 100 |
| S6 | f                   | Wildtype-like morphology                        | 15 | 15 | 100 |
| S7 | <i>mnx1</i> , F59   | Shortened slow muscle fibers                    | 18 | 18 | 100 |
| S7 | <i>mnx1</i> , F310  | Wildtype-like fast muscle fibers                | 21 | 21 | 100 |
| S7 | <i>ntla</i> , F59   | Disorganized, shortened slow muscle fibers      | 23 | 23 | 100 |
| S7 | <i>ntla</i> , F310  | Shortened fast muscle fibers                    | 20 | 20 | 100 |
| S7 | <i>Cyc</i> , F59    | Disorganized and fewer slow muscle fibers       | 26 | 26 | 100 |
| S7 | <i>Cyc</i> , F310   | Wildtype-like fast muscle fibers                | 29 | 29 | 100 |
| S8 | b                   | Incomplete notochord vacuolization              | 35 | 34 | 97  |
| S8 | c                   | Reduced cell-cell contacts within the notochord | 27 | 25 | 93  |
| S8 | d                   | Incomplete notochord vacuolization              | 16 | 12 | 75  |
| S8 | e                   | Incomplete notochord vacuolization              | 20 | 14 | 70  |
| S8 | f                   | Incomplete notochord vacuolization              | 21 | 14 | 67  |
| S8 | h                   | Incomplete notochord vacuolization              | 18 | 9  | 50  |
| S8 | i                   | Incomplete notochord vacuolization              | 21 | 8  | 38  |
| S8 | j                   | Incomplete notochord vacuolization              | 27 | 18 | 67  |
| S9 | a, 6-hpf UV         | Wildtype-like <i>flh</i> expression             | 12 | 12 | 100 |
| S9 | b, 6-hpf UV         | Wildtype-like <i>flh</i> expression             | 12 | 12 | 100 |



**Supplementary Table 12. Primer sequences used to verify MO-induced RNA missplicing.**

| <b>Transcript</b>              | <b>Forward</b>             | <b>Reverse</b>            |
|--------------------------------|----------------------------|---------------------------|
| <i>LOC563543 (inpp5b)</i> MO   | TTCGGCCTGCGGGATAACCTC      | GAACTGGAAGCGGATGGAAACTGC  |
| <i>LOC795255 (slc38a8)</i> MO1 | AAGGCTGGCGGCGTGAACA        | GAAGCCCATGAGCCCAATCCT     |
| <i>mnx1</i> MO1 or MO2         | CTCCCTGCCACCTCATCCAT       | GGCCTTTTTACTGCGCTTCCATTTT |
| <i>snai2</i> MO                | GGAAGATGAGGCTCTGCTGGAACG   | CGATCTGCGAATGCACGACTGC    |
| <i>tacc2</i> MO                | ATGGCTCAATCAGTCCCTTCAAATCA | GCCCTTCGAAACGCTGCTGTC     |
| <i>znf385</i> MO1              | TGCAACACAGAGTGACGCCAAGTCT  | ACCGCGGGCGCAACAGG         |
| <i>znf385</i> MO2              | CCGGTCGGCCTGTTCCCTAAT      | GGTTTGCCTGCCACTCTGTCCTT   |

**Supplementary Table 13. Primer sequences used to generate *in situ* probes.**

| Transcript                            | Forward                  | Reverse                    |
|---------------------------------------|--------------------------|----------------------------|
| <i>aldh1a2</i>                        | AGACGCGATGACCTCCAGTGAAGT | CCGAGGTAGAGGCAGGTGAGAGG    |
| <i>cav3</i>                           | CGCCGCAGCTGTCTCTACCATT   | AGGCCACCCGAACACTGCTAAAG    |
| <i>col8a1a</i>                        | CCCGGGCCAAAAGGAGAAGTT    | AACCCGGAGAAGGAGGAGTGGA     |
| <i>frzb</i>                           | CTGGCCTTCGCATGTCTCCTG    | TATCTGGCCCCTCCGCTTTGA      |
| <i>her1</i>                           | CCAAAACCTCCGCCTCTGCTC    | CCTGGGACGACCGGTAATGAAGT    |
| <i>kirrel3l</i>                       | CTGCTGCCGCCACAATGCTAA    | TCCCCGTCCGATTCCACATTC      |
| <i>lhx1a</i>                          | CGGAGGGCACGGAGCAAAGT     | GGGCCCCGAAAACATCTGAGGAC    |
| <i>LOC563543 (inpp5b)</i>             | ACTCGCATCTCGCCGCACAC     | GAAGCAGCTGGGCAGGTAGGAG     |
| <i>LOC566628 (pskh2)</i>              | GGGCTGGCCTGTTGGGATAAGT   | CCGGCGCTGGAGGTTTCTG        |
| <i>LOC795255 (slc38a8)</i>            | CTCATTGGGGCCATTTTCATCAT  | AGTCGCAGCCAGAGTTCCCATTAC   |
| <i>lrch2</i>                          | TGAACTGTCCGATCTGCCATTGA  | TCAGCCCCTGCCGTTTCTG        |
| <i>lrrc8da</i>                        | TGACCATTTGCGATGCCTACACA  | TCTGGGATGCTGGTGATGTTGTTATG |
| <i>mnx1</i>                           | CTCCCTGCCACCTCATCCAT     | GGCCTTTTTACTGCGTTCCATT     |
| <i>notch1b</i>                        | ACGGGCGCACAGGTCTGTTG     | ATCCCGTTTCGCAGGCACAC       |
| <i>p4ha1</i>                          | AGCCGCCTGTTTTGCCGTTAC    | ACTGCTGCTCCTACATCCGTGAAG   |
| <i>pak1</i>                           | CCGCCCATGAGGAACACCAG     | CCCCTGGCCGATCTTCTCAA       |
| <i>plod1a</i>                         | CGCCCGCTCAGAGGATTATGTG   | TGAAAGTGGAGGCGTCGTGATG     |
| <i>prickle2</i>                       | CTGCGGGGAACACATCGGTATT   | GTGGCCCAACATCCTTTTCTTC     |
| <i>ptrfb</i>                          | GGAAGGGGAAGCTGAGGGTGAA   | AGCGGGCGTAGATGGTGTGGT      |
| <i>rbm38</i>                          | GGATAAAAGTGCAGCGGAAAGAGC | GGGTGGAGATGGCGGAGGAT       |
| <i>si:ch211-215a10.5-001 (hpcal4)</i> | CAGCAAGCTGGCTCCTGAGGTG   | TTTGGCCGTTCTTTGAACTCC      |
| <i>snai2</i>                          | AGCGCTGGAAGATGAGGCTCTG   | GCAGGTGGGCTCGGAGGTTTC      |
| <i>tacc2</i>                          | CCAATCCCCAAGGCATCATAAAC  | CGGTCCGCTGTGGGAAATCTT      |
| <i>tbx6</i>                           | GGAACGGCCTGTGCTGGACTTA   | ATGTGTAGACGGGGCTGGTATTTGTG |
| <i>tspan7b</i>                        | AGCGGAGGGAGGAAAGGCACTA   | CAAAGGCAACAAAACCACCGATAAC  |
| <i>unc45b</i>                         | GGCAGGTCGGCAGGGTGTAAT    | GCAGGCGACCGCATACAGGAT      |
| <i>wnt8a</i>                          | ATCGGAAAAATGGGTGGTTCGTG  | GCCGCCTGCAGCTTCTTCTCT      |
| <i>wu:fb47f06 (guca2b)</i>            | CCGTCGCTTTCCTCGTCGTG     | TGCAAGCCGCGAAAGCACA        |
| <i>zgc:110418 (kcnk6)</i>             | CGCCGGTAAAGCCTTCTCCATC   | CCGTCCAGCCGTAACATCAGC      |
| <i>zgc:91787 (b3gnt7)</i>             | GCGGCGGCGTGGATGTT        | GACTTTGCGGGCCACCTGAGA      |
| <i>znf385b</i>                        | GAGGCACGAAATGGAGCAGGTC   | GAGCGGCACGGAGAAACGAG       |

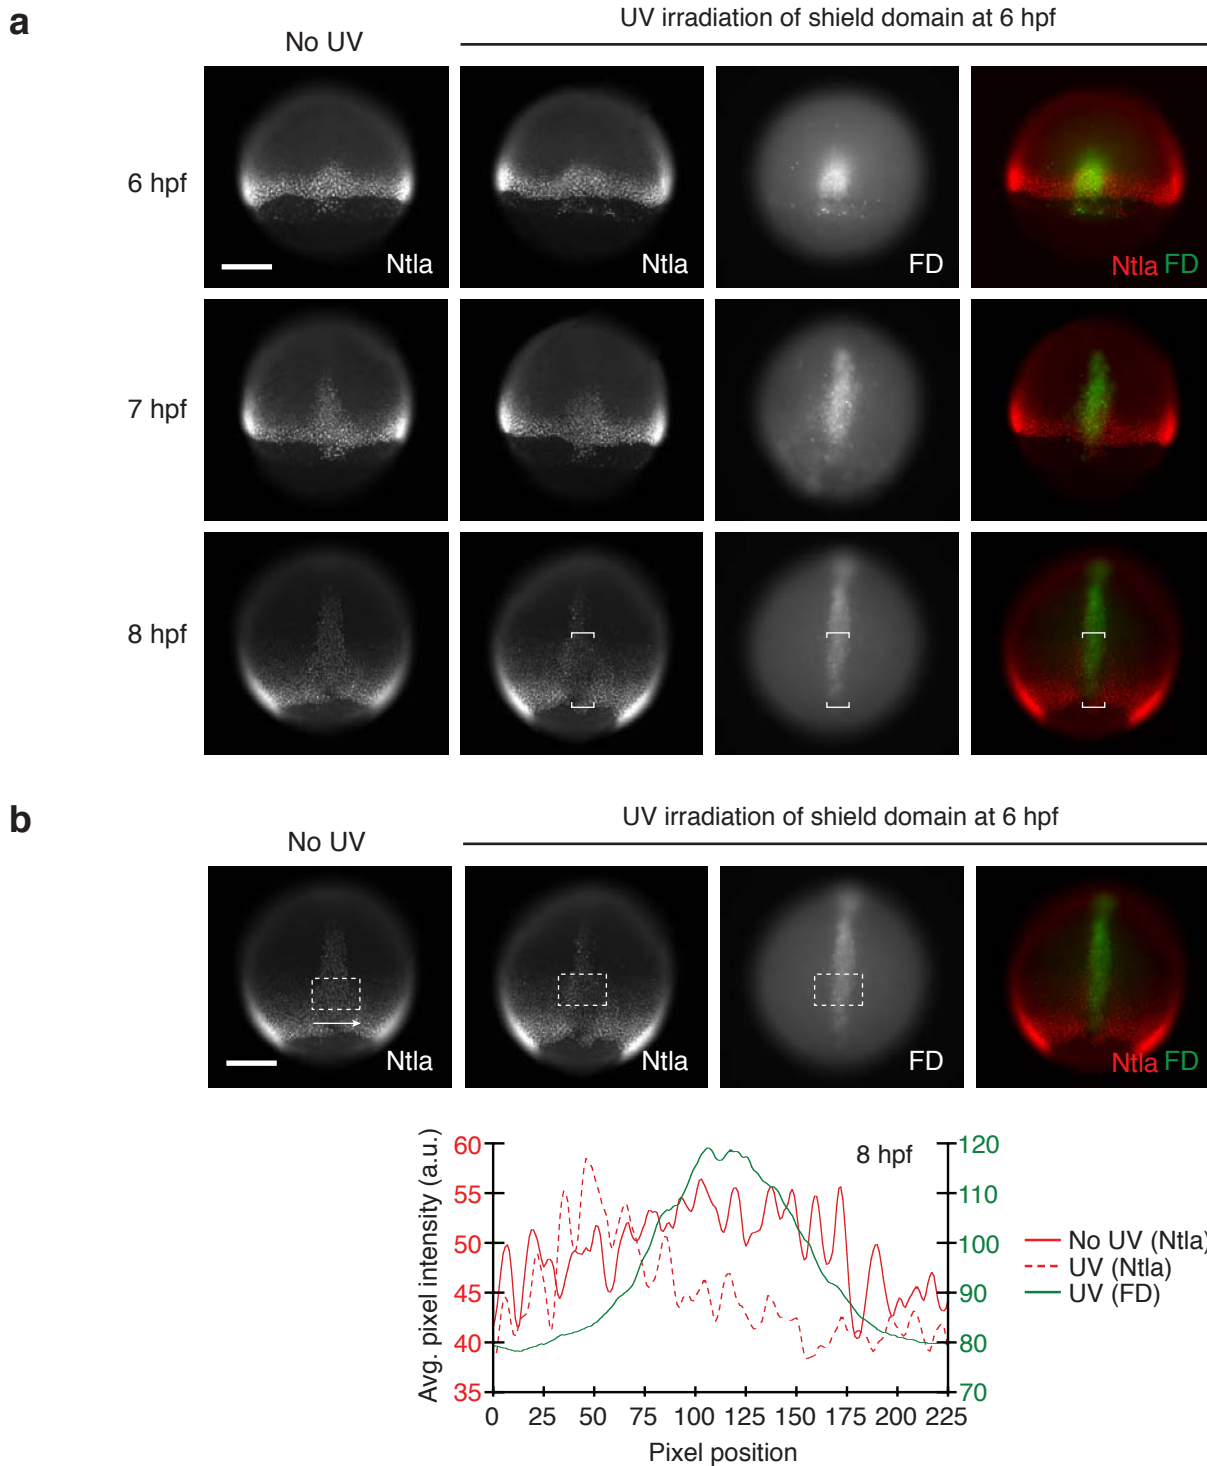

**Supplementary Figure 1. Ntla protein depletion after *ntla* cMO photoactivation within the embryonic shield.** **a**, Zebrafish zygotes were injected with a *ntla* caged morpholino (cMO)/caged fluorescein-conjugated dextran (cFD) mixture and then irradiated within a 100  $\mu$ m-diameter region centered on the shield domain at 6 hours post fertilization (hpf). The irradiated embryos fixed at various developmental time points were assessed by whole-mount immunostaining for Ntla and uncaged fluorescein-conjugated dextran (FD) levels. Non-irradiated embryos were processed and analyzed in an equivalent manner to provide a comparison control, and regions of Ntla protein depletion are indicated by the brackets. **b**, Quantification of Ntla protein levels in 8-hpf embryos after *ntla* cMO photoactivation. Regions demarcated by the dashed white lines were selected for quantification, and average pixel intensities for each position along the horizontal axis (arrow) were determined using ImageJ software. Pixel intensities for Ntla immunostaining in non-irradiated (red line) and locally irradiated (dashed red line) embryos are shown, as well as those for FD immunostaining in locally irradiated embryos (green line). Embryo orientations: dorsal view and anterior up. Scale bars: 200  $\mu$ m.

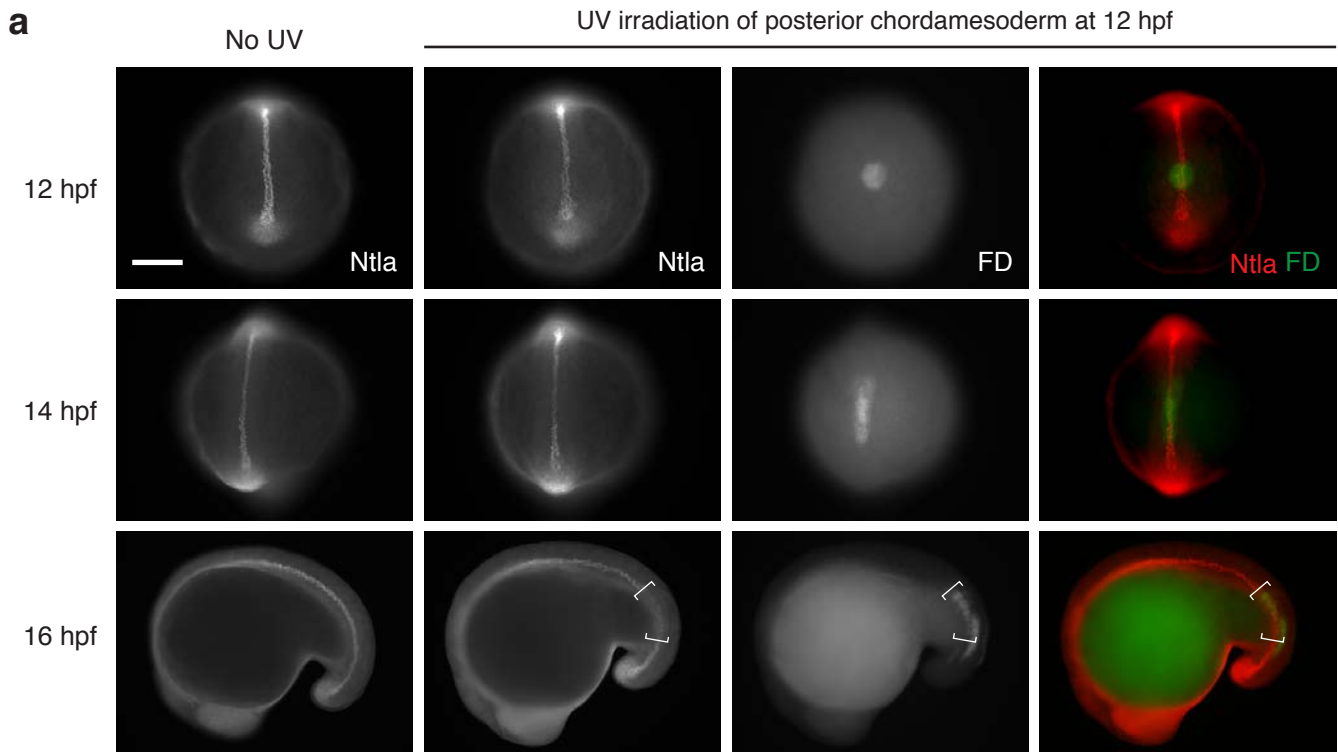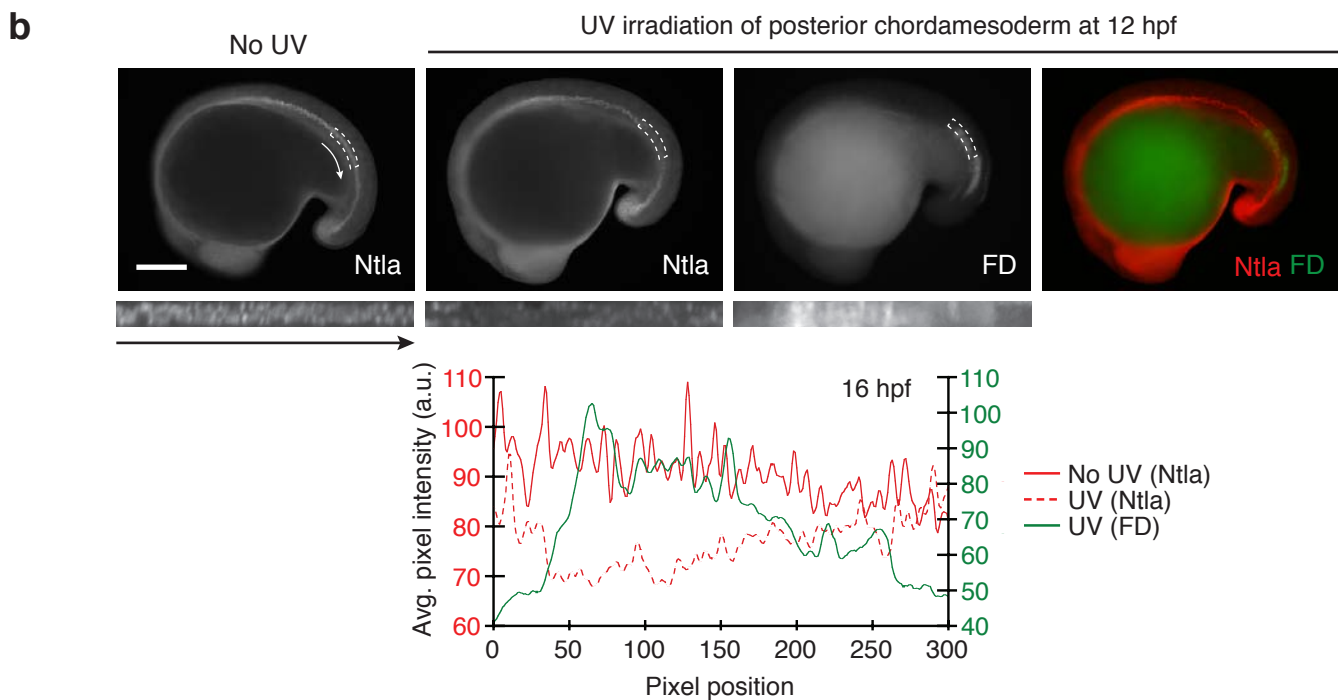

**Supplementary Figure 2. Ntla protein depletion after *ntla* cMO photoactivation within posterior chordamesoderm.**

**a**, Zebrafish zygotes were injected with a *ntla* cMO/cFD mixture and then were irradiated within a 100  $\mu$ m-diameter region within the posterior chordamesoderm at 12 hpf. The irradiated embryos were fixed at various time points, and Ntla and FD were detected by immunofluorescence. Non-irradiated embryos were processed and analyzed in an equivalent manner to provide a comparison control, and regions of Ntla protein depletion are indicated by the brackets. **b**, Quantification of Ntla protein levels in 16-hpf embryos after *ntla* cMO photoactivation. Regions demarcated by the dashed white lines were selected for quantification, and image data straightened by ImageJ software is shown below each embryo micrograph. Average pixel intensities for each position along the anterior-posterior axis (arrows) were determined using ImageJ software. Pixel intensities for Ntla immunostaining in non-irradiated (red line) and locally irradiated (dashed red line) embryos are shown, as well as those for FD immunostaining in locally irradiated embryos (green line). Embryo orientations: 12 hpf, dorsal view and anterior up; 14 hpf, posterior dorsal view and dorsal up; 16 hpf, lateral view and anterior left. Scale bars: 200  $\mu$ m.

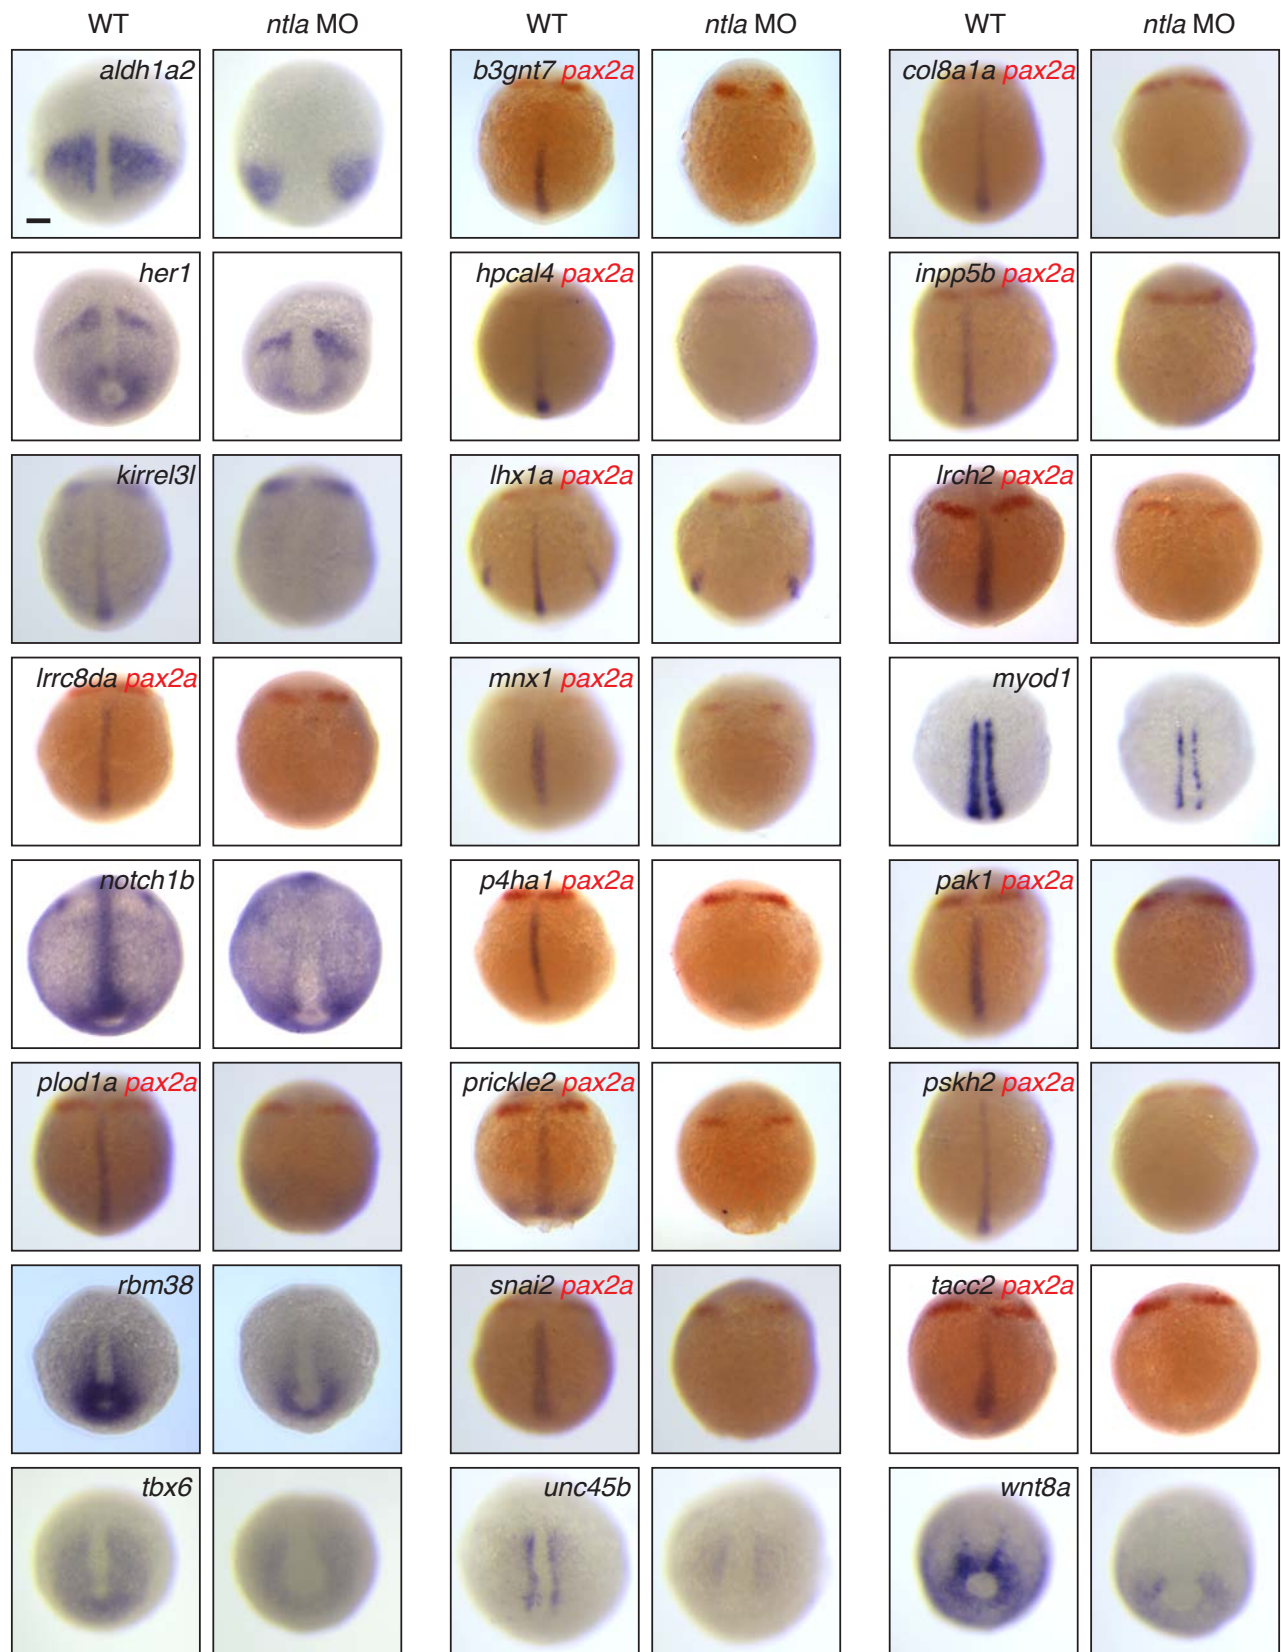

**Supplementary Figure 3. Confirmation of selected microarray hits associated with notochord cell fate commitment by *in situ* hybridization.** 10-hpf wildtype and *ntla* MO-injected embryos stained for candidate Ntla targets expressed during gastrulation are shown, with co-labeling of *pax2a* transcripts in some cases to determine embryo orientation. All 24 genes tested were confirmed to be transcribed in a Ntla-dependent manner. *kirrel3*, *lhx1a*, and *notch1b* transcript levels were specifically reduced in the axial mesoderm of *ntla* morphants, whereas their other expression domains were unaffected. Similarly, expression of *her1*, *rbm38*, *tbx6*, and *wnt8a* in *ntla* morphants was specifically reduced in the tailbud. In addition to these genes, another hit in our microarray data (**Supplementary Table 1**), *wnt3l*, has previously been shown to be expressed in a Ntla-dependent manner (Ref. 4). Embryo orientations: *her1*, *rbm38*, *tbx6*, *wnt8a*, posterior dorsal view and anterior up; all others, dorsal view and anterior up. Scale bar: 100  $\mu$ m.

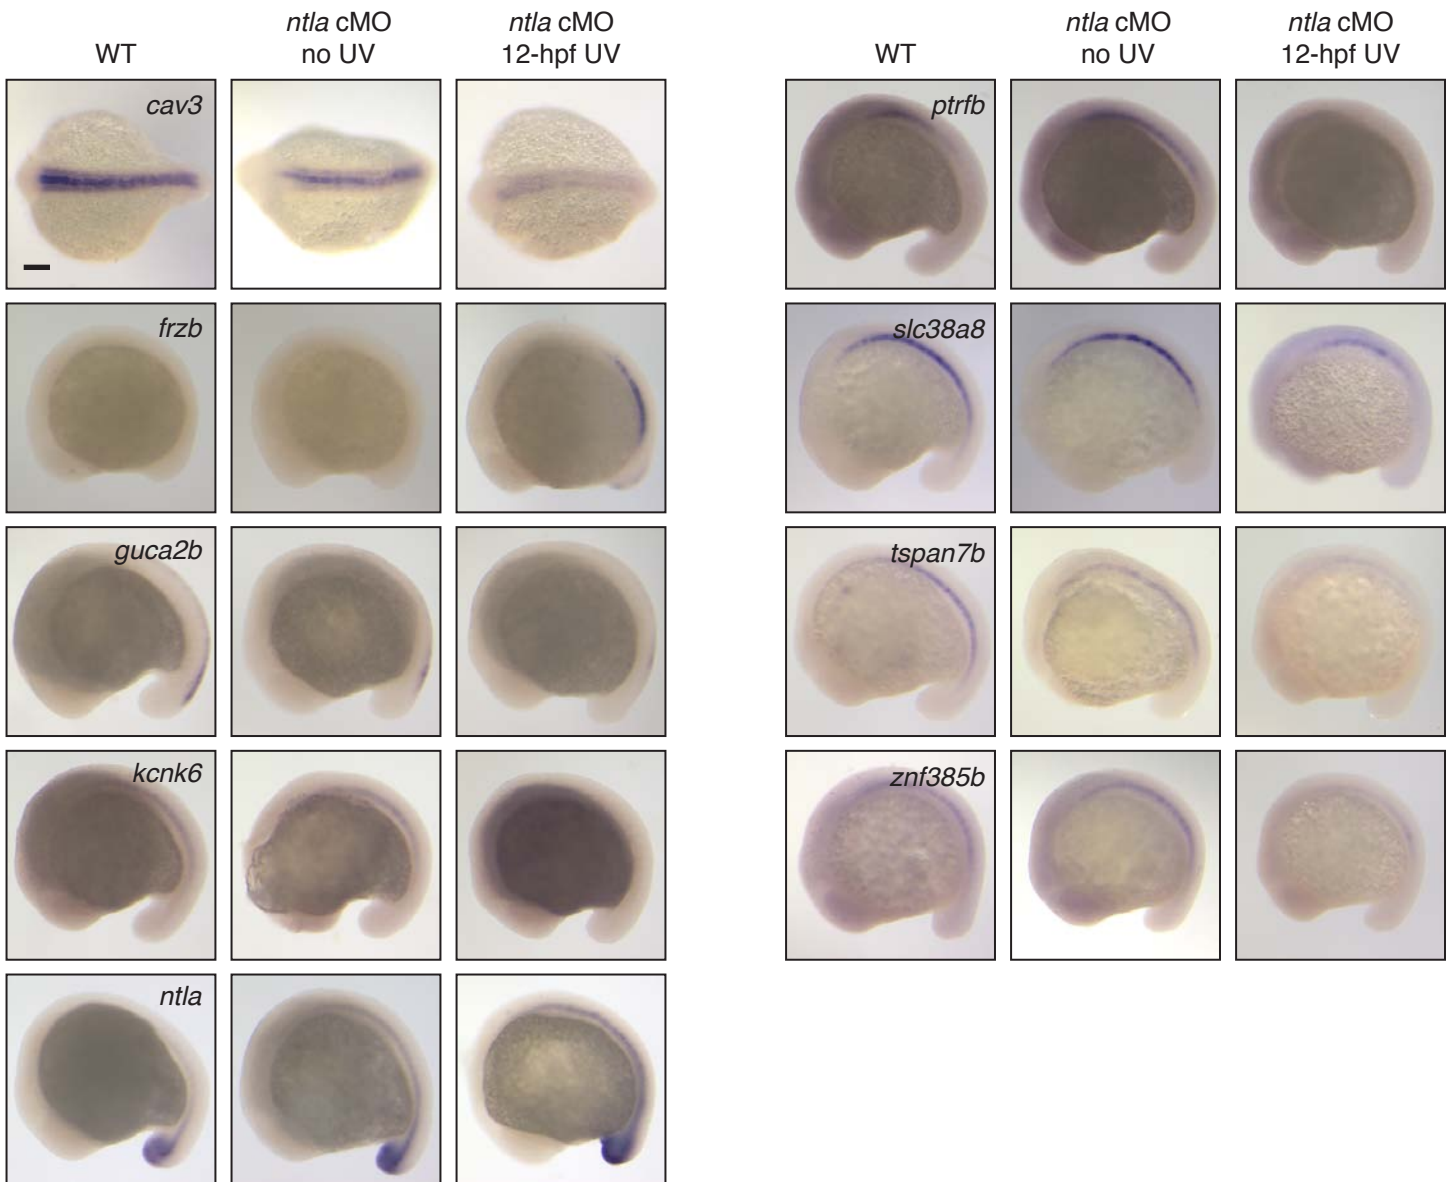

**Supplementary Figure 4. Confirmation of selected microarray hits associated with notochord maturation by *in situ* hybridization.** 16-hpf *ntlA* cMO-injected embryos that were either cultured in the dark or globally UV irradiated at 12 hpf are shown. Of the nine genes tested, all but *guca2b* were confirmed to be transcribed within the axial mesoderm in a *NtlA*-dependent manner. *cav3* transcript levels were specifically reduced in the chordamesoderm of irradiated embryos, whereas somitic expression was unaffected. The increase in *ntlA* transcript levels upon *ntlA* cMO photoactivation is potentially a consequence of *ntlA* mRNA stabilization by the uncaged MO. Embryo orientations: *cav3*, dorsal view and anterior left; all others, lateral view and anterior left. Scale bar: 100  $\mu$ m.

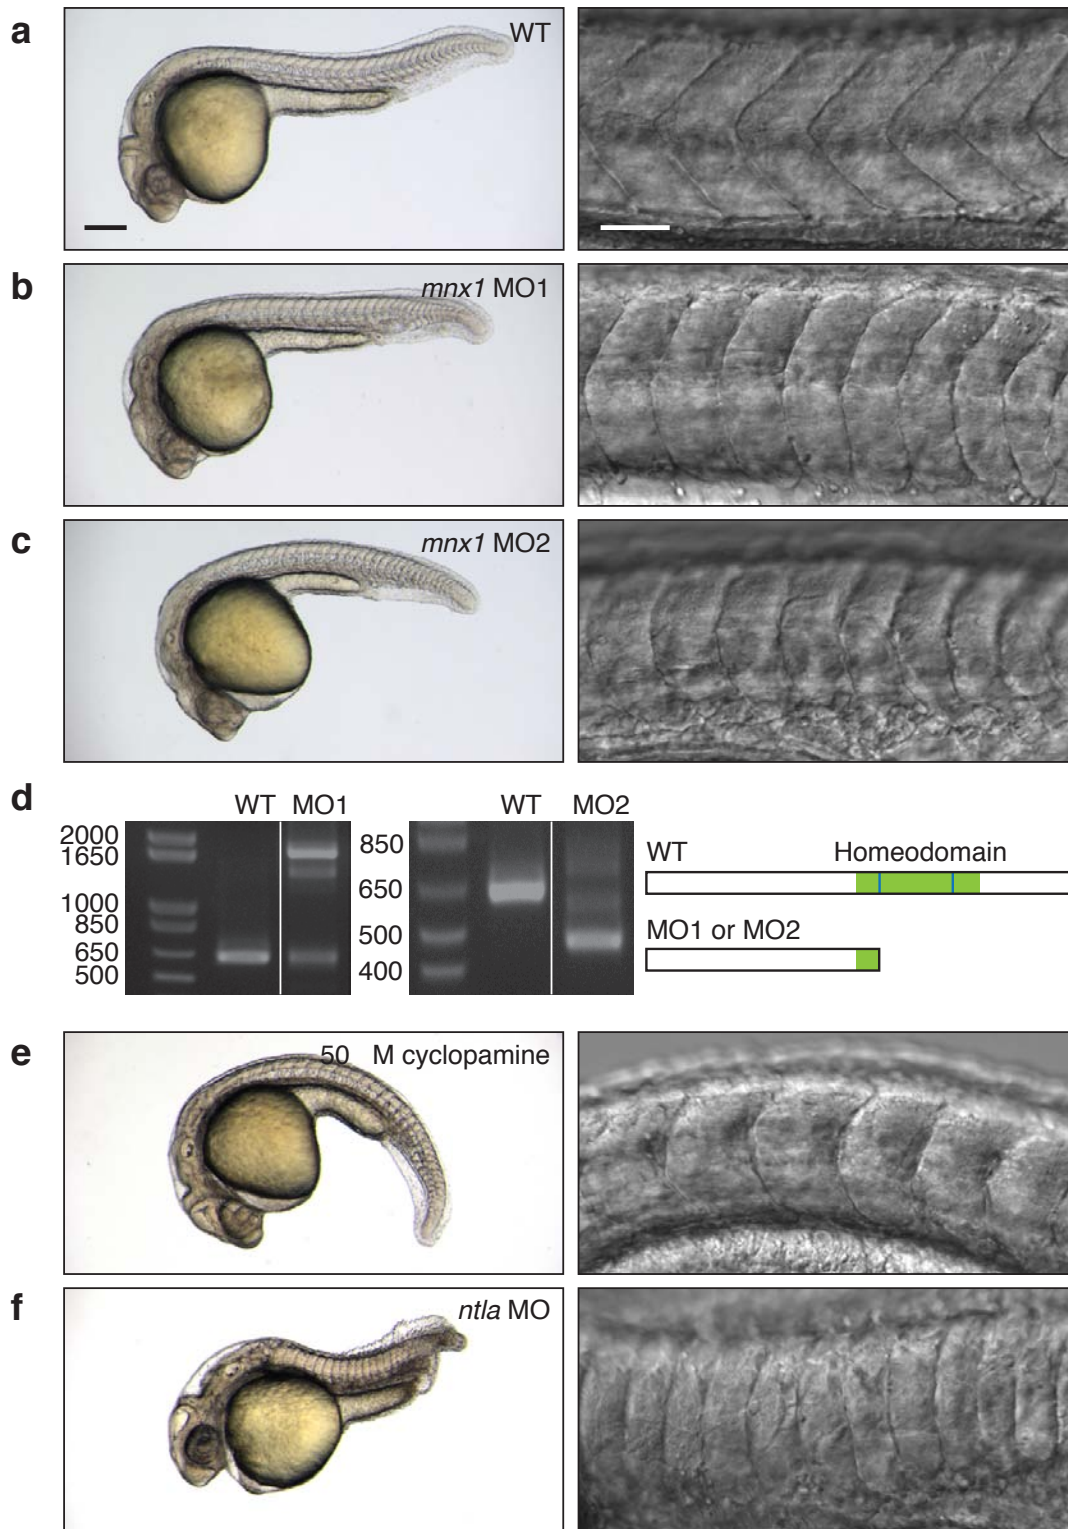

**Supplementary Figure 5. Knockdown of *mnx1* expression induces somite morphology defects that differ from Hedgehog pathway loss-of-function phenotypes.** **a-c**, Somite patterning in wildtype embryos and those previously injected with non-overlapping, splice-blocking *mnx1* MOs. Brightfield and DIC micrographs of 1-dpf embryos are shown. **d**, Confirmation of *mnx1* MO-dependent RNA missplicing by RT-PCR. *Mnx1* proteins encoded by the observed transcripts are shown as bar diagrams, with sites corresponding to exon-intron boundaries depicted as blue lines and known protein domains colored green. Exon-intron assignments are based on the Zv8 zebrafish genome assembly Zv8, gene build 59. **e**, Cyclopamine treatment of embryos starting at 5 hpf resulted in ventral body curvature and U-shaped somites that are shortened along the dorsoventral axis, consistent with loss of Hedgehog pathway-dependent muscle fates. **f**, *ntlA* morphants also exhibited curved somites, but they were morphologically more similar to *mnx1* morphants than to cyclopamine-embryos. Embryo orientations: lateral view and anterior left. Scale bars: whole-embryo brightfield micrograph, 200  $\mu$ m; DIC micrograph, 50  $\mu$ m.

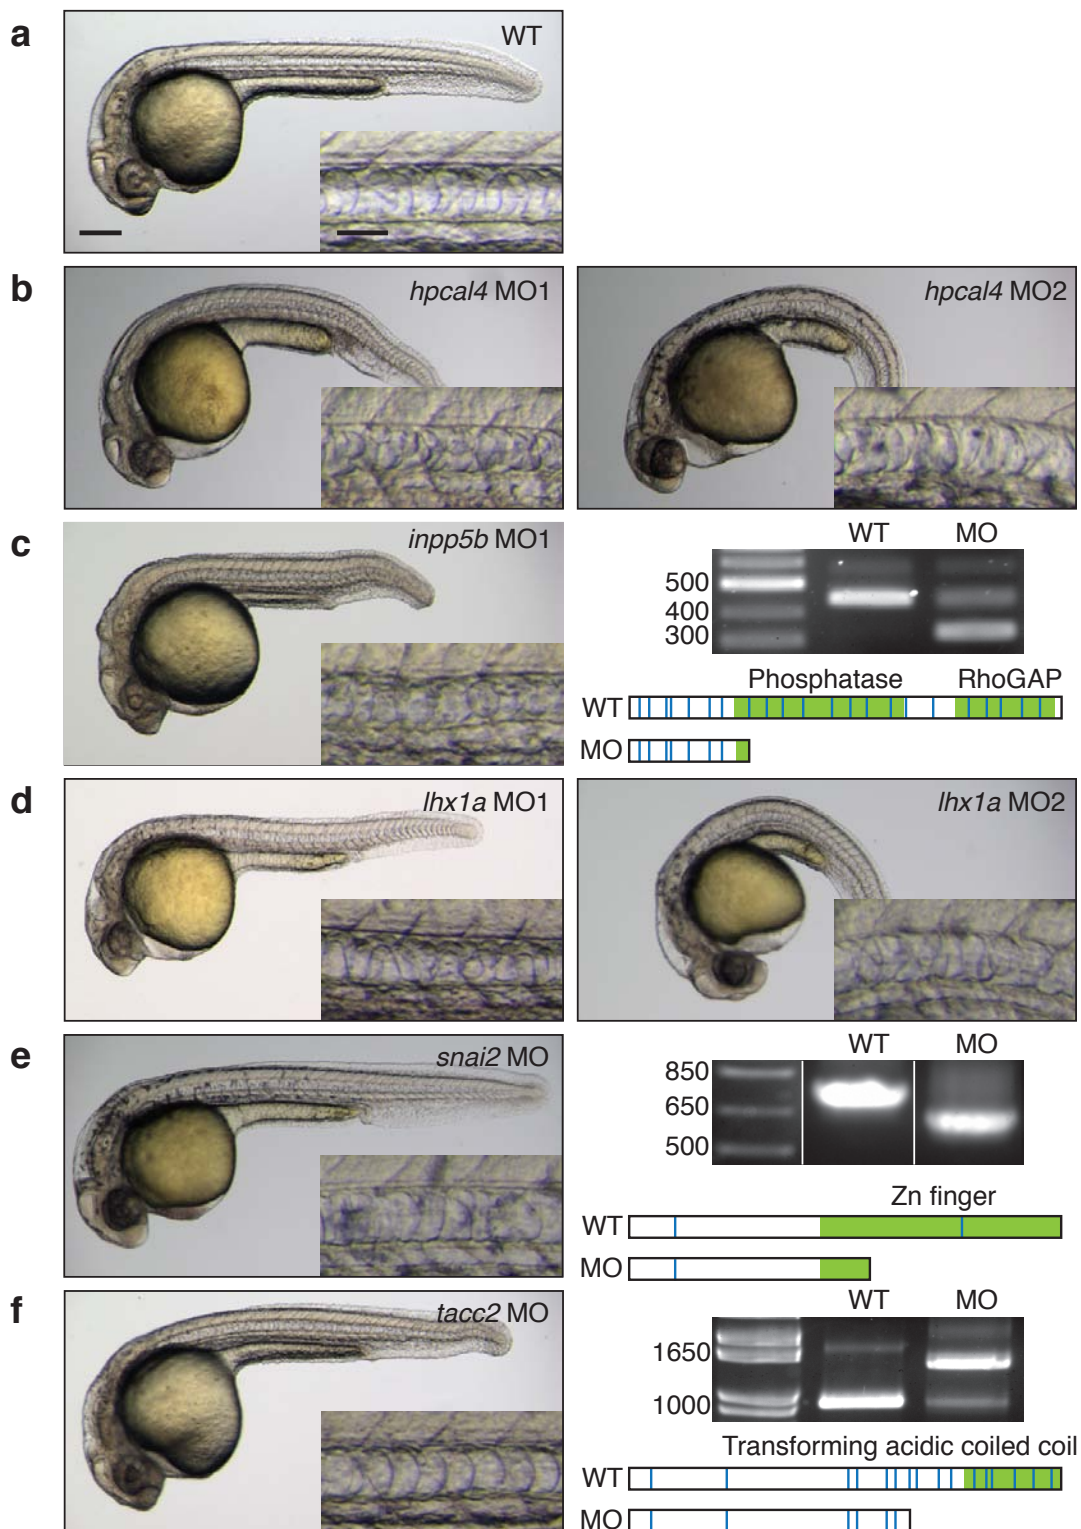

**Supplementary Figure 6. Representative morphants of Ntla-dependent genes expressed during gastrulation that do not exhibit clear notochord defects.** Brightfield micrographs of selected morphants at 1 day post fertilization (dpf) are shown. In cases where a splice-blocking MO was used, RNA missplicing was confirmed by RT-PCR. Proteins encoded by these transcripts are shown as bar diagrams as described in **Supplementary Figure 5**. **a**, Wildtype control. **b**, Embryos injected with two different translation-blocking MOs targeting *hpcal4* at their maximum non-toxic doses exhibited ventral body curvature but wildtype-like notochord cells. **c**, Embryos injected with a splice-blocking MO targeting *inpp5b* had mild notochord necrosis despite co-injection with a *tp53* MO. **d**, Embryos injected with two different translation-blocking MOs targeting *lhx1a* at their maximum non-toxic doses had morphologically normal notochords, although one MO induced ventral curvature and shortening along the anterior-posterior axis. **e-f**, Embryos injected with splice-blocking MOs against *snai2* or *tacc2* had wildtype-like notochords even though the targeted RNA was misspliced as expected. Embryo orientations: lateral view, dorsal up and anterior left. Scale bars: whole-embryo micrograph, 200  $\mu$ m; inset, 50  $\mu$ m.



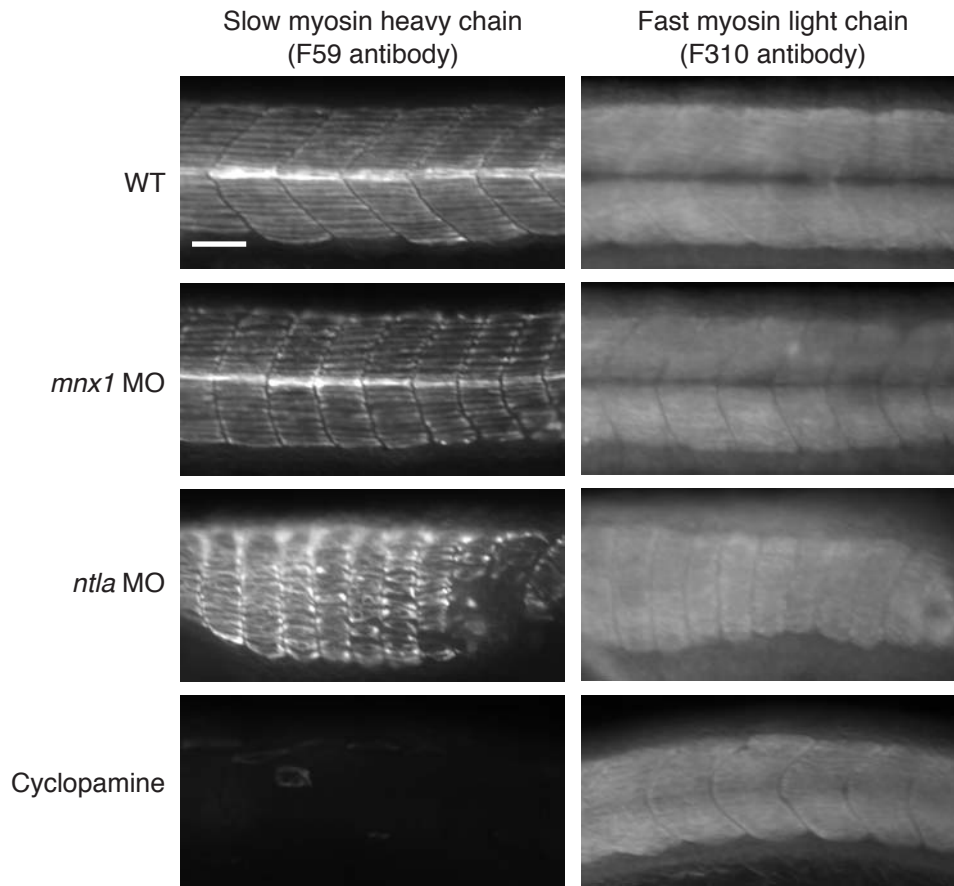

**Supplementary Figure 7. Knockdown of *mnx1* expression induces muscle differentiation defects that differ from Hedgehog pathway loss-of-function phenotypes.** Slow myosin heavy chain and fast myosin light chain expression in wildtype zebrafish and embryos treated with an *mnx1* MO, a *ntla* MO, or 50  $\mu$ M cyclopamine. 1-dpf embryos are shown. Embryo orientations: lateral view and anterior left. Scale bar: 50  $\mu$ m.

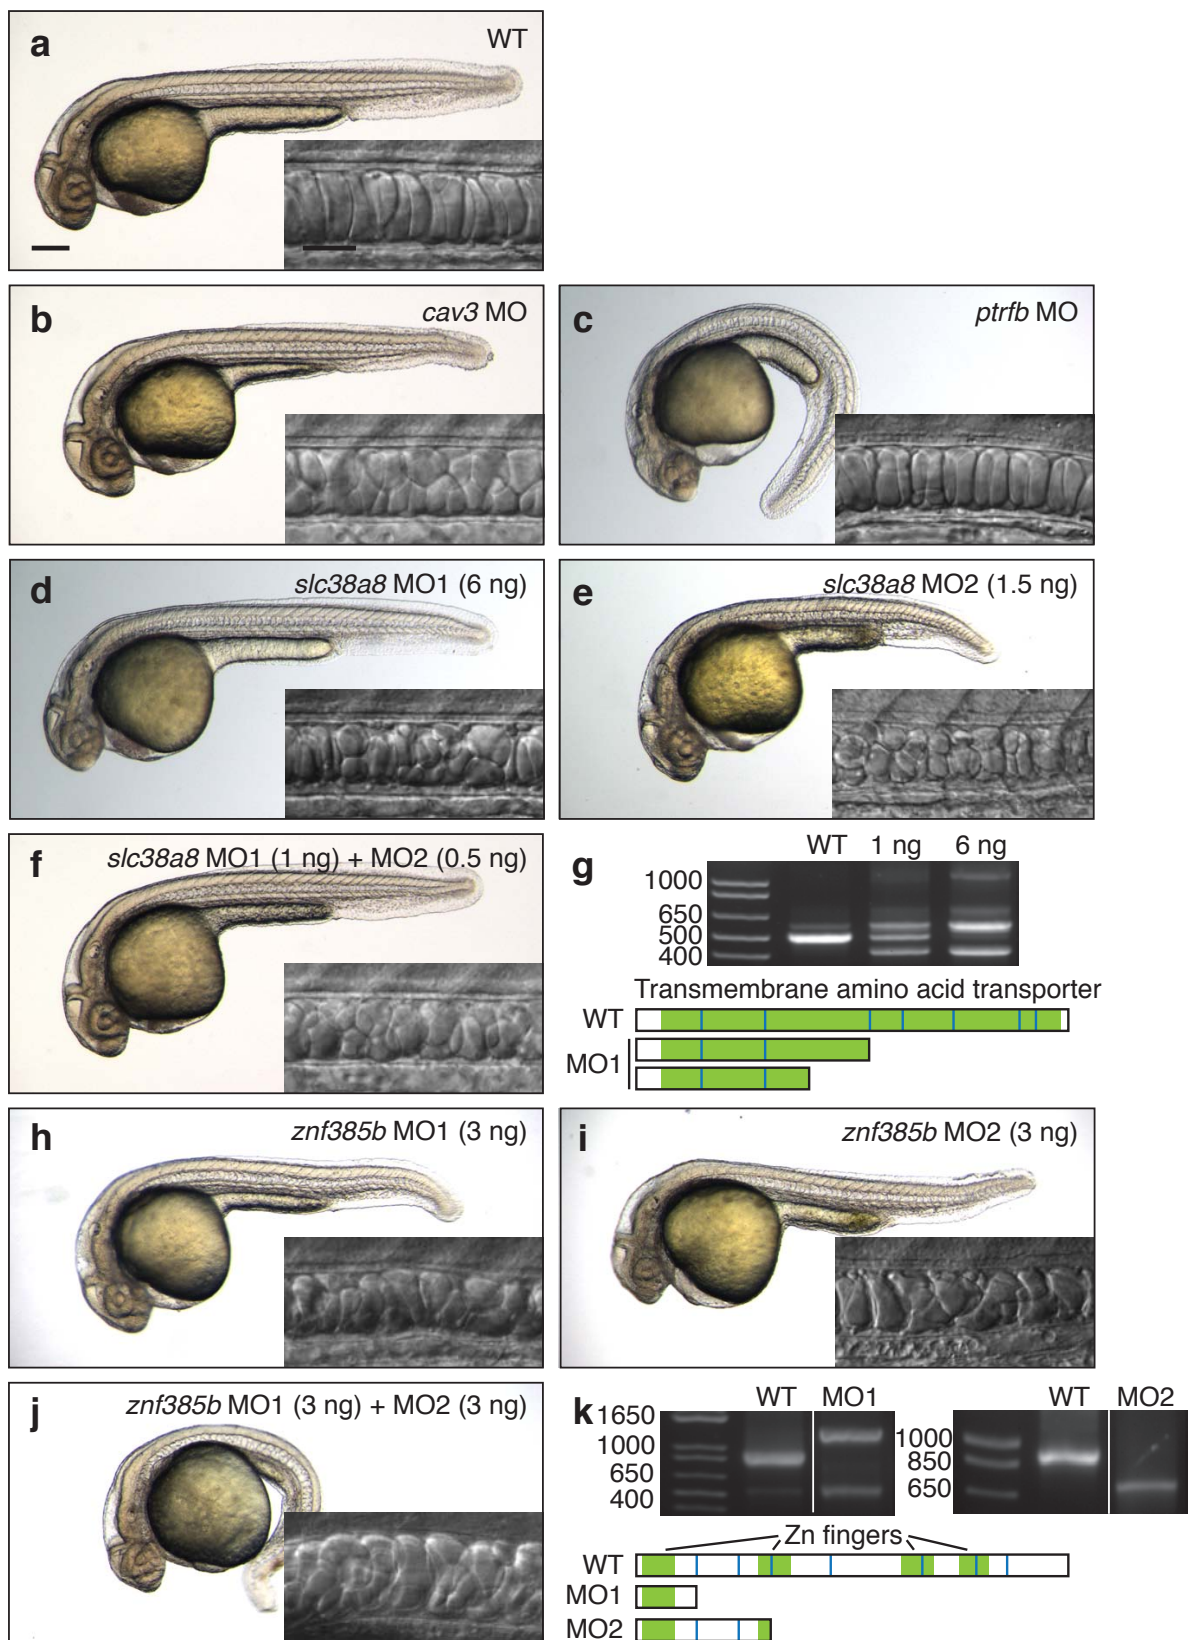

**Supplementary Figure 8. Morphants of several Ntla-dependent genes expressed during somitogenesis exhibit aberrant notochord cell morphology.** Brightfield and DIC (inset) micrographs of selected morphants at 1.5 dpf are shown. In cases where a splice-blocking MO was used, RNA missplicing was confirmed by RT-PCR. Proteins encoded by these transcripts are shown as bar diagrams as described in **Supplementary Figure 5**. **a**, Wildtype control. **b**, Embryos injected with a *cav3* MO had disorganized, incompletely vacuolated notochord cells. **c**, Embryos injected with a *ptrfb* MO exhibited reduced notochord cell-cell contacts and ventral body curvature. **d-e**, Embryos injected with either splice-blocking or translation-blocking *slc38a8* MOs (MO1 and MO2, respectively) had incompletely vacuolated notochord cells. **f**, Co-injection of both *slc38a8* MOs at sub-phenotypic doses synergistically induced similar notochord defects. **g**, Confirmation of *slc38a8* MO-dependent RNA missplicing by RT-PCR. **h-i**, Embryos injected with splice-blocking *znf385b* MOs (MO1 or MO2) exhibited partially vacuolated notochord cells. **j**, Co-injection of both *znf385b* MOs led to a stronger notochord defect. **k**, Confirmation of *znf385b* MO-dependent RNA missplicing by RT-PCR. Embryo orientations: lateral view and anterior left. Scale bars: whole-embryo brightfield micrograph, 200  $\mu$ m; DIC inset, 50  $\mu$ m.

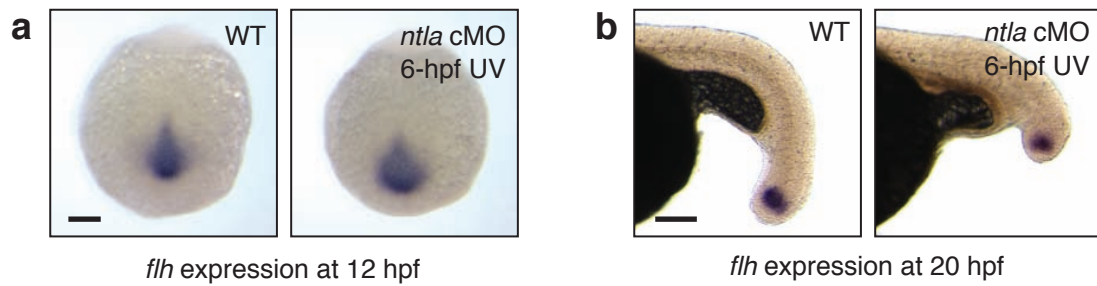

**Supplementary Figure 9. Temporal analysis of Ntla-dependent *flh* transcription.** **a-b**, Expression of *flh* at 12 hpf and 20 hpf in wildtype zebrafish, as well as in embryos injected with the *ntla* cMO and irradiated globally at 6 hpf. Embryo orientations: **a**, dorsal posterior view and dorsal up; **b**, lateral view and anterior left. Scale bars: **a**, 100  $\mu$ m; **b**, 200  $\mu$ m.

## SUPPLEMENTARY METHODS

|                                                         |       |
|---------------------------------------------------------|-------|
| <b>Caged fluorescein dextran</b> .....                  | 37    |
| <b>Ntla polyclonal antibody</b> .....                   | 37-38 |
| <b>Imaging of zebrafish embryos</b> .....               | 38-39 |
| <b>Cyclopamine treatment of zebrafish embryos</b> ..... | 39    |

### **Caged fluorescein dextran (cFD) preparation**

Aminodextran (3.5-5 mg of 10-kDa polymer; Invitrogen, D1860) dissolved in 500  $\mu$ L of 0.1 M  $\text{Na}_2\text{B}_4\text{O}_7$  buffer (pH 8.5) was added to carboxymethylnitrobenzyl (CMNB)-caged fluorescein N-hydroxysuccinimide ester (1 mg; Invitrogen, C20050) in the manufacturer-supplied tinted tube, and the reaction mixture was vortexed overnight. The resulting cFD was separated from unreacted caged fluorescein using a Zeba Desalt spin column (Thermo Fisher Scientific, 89889) according to the manufacturer's instructions. The yellow-colored eluent was lyophilized to dryness, weighed, dissolved in water to make a 1% (w/v) stock solution, and stored at  $-20\text{ }^\circ\text{C}$  as 2- $\mu$ L aliquots. Spectroscopic analysis indicated an average loading of 2.5 caged fluoresceins per dextran molecule.

### **Ntla polyclonal antibody**

Full-length *ntla* cDNA flanked by 5' EcoRI and 3' BamHI sites was generated by PCR using cDNA derived from 10-hpf zebrafish embryos as a template and the following primers: 5'-CGAATTCATGTCTGCCTCAAGTCCCGACCA-3' and 5'-CGGATCCTCAGTAGCTCTGAGCCA-CAGGCG-3'. The *ntla* cDNA was then cloned into a pCR-Blunt II-TOPO vector (Invitrogen), digested with EcoRI and BamHI, and ligated into similarly cut pMALc2x vector (NEB) to generate a bacterial expression construct encoding an Ntla-maltose binding protein (MBP) fusion (pMALc2x-Ntla). The pMALc2X-Ntla vector was transformed into BL21 competent cells and a single colony was cultured in 80 mL LB-ampicillin broth overnight. This starter culture was then used to inoculate 1 L of 2X YT broth (16 g tryptone, 10 g yeast extract, 5 g NaCl, 2 g glucose, 100 mg ampicillin, 1 L water) and cultured for 2 hours at  $37\text{ }^\circ\text{C}$ , followed by 1 hour at  $30\text{ }^\circ\text{C}$  to achieve an  $\text{OD}_{600}$  of 0.8-1.0. IPTG (0.5 mM) was added to the culture, which was grown for another 6 hours at  $30\text{ }^\circ\text{C}$ . Cells were then harvested by centrifugation (4,000  $\times g$ , 20 minutes,  $4\text{ }^\circ\text{C}$ ), resuspended in column buffer (50 mL; 200 mM NaCl, 1 mM EDTA, 0.07% (v/v) 2-mercaptoethanol, 20 mM Tris-HCl, pH 7.4), chilled to  $-72\text{ }^\circ\text{C}$  in a dry ice/ethanol bath,

thawed in ice water, and sonicated 8 x 15 seconds in ice water. Triton X-100 was added to a final concentration of 1% (v/v), and the lysate was mixed gently at 4 °C for 30 minutes to solubilize the Ntla-MBP fusion. The lysate was next centrifuged (12,000 x g, 30 minutes, 4 °C) and the supernatant was passed over amylose resin (5 mL; NEB) that was previously packed into a gravity flow column and equilibrated with the column buffer (40 mL). The loaded amylose resin was washed with column buffer (60 mL) and eluted in 1-mL fractions with column buffer containing 20 mM maltose. Fractions containing the 89 kDa Ntla-MBP fusion protein were pooled and concentrated to 1 mg/mL using an Amicon Centricon centrifugal filter device.

The purified Ntla-MBP fusion protein (4 mg) was cleaved with Factor Xa (40 µg) and Ntla was separated from MBP by DEAE-Sepharose ion exchange chromatography using a pMAL Fusion & Purification System kit (NEB) according to the manufacturer's instructions. Rabbit inoculation and serum collection were conducted by Rockland Immunochemicals using their standard procedures. To affinity purify the polyclonal anti-Ntla antibody, an affinity column was prepared by expressing and purifying the Ntla-MBP fusion protein (4 mg) as described above, dialyzing the protein in 1 L 1X PBS for 12 hours, and immobilizing it onto 1 mL of AminoLink resin (Pierce) according to the manufacturer's instructions. The polyclonal anti-Ntla antibody serum (1 mL) was then passed over the gravity-flow affinity column, eluted with 0.1 M glycine-HCl buffer, pH 2.5-3.0. Each 200-µL fraction containing the purified antibody was then neutralized with 10 µL of 1 M Tris-HCl, pH 9.

### **Imaging of zebrafish embryos**

For live imaging of 24- or 36-hpf zebrafish, the embryos were manually dechorinated and immobilized in E3 medium containing 0.5% (w/v) low-melt agarose and 0.05% (w/v) Tricaine mesylate. Brightfield images were acquired using a Leica M205FA fluorescence stereoscope equipped with a Leica DFC500 digital camera. Differential interference contrast (DIC) micrographs were obtained with a Leica DM4500B epifluorescence microscope equipped

with a 20x/0.5 NA water-immersion objective and a QImaging Retiga-SRV digital camera. Confocal fluorescence and DIC images were obtained with a Zeiss Axio Imager Z1 upright microscope equipped with a 20x/0.5 NA water-immersion objective, fluorescence and transmission photomultiplier tube detectors, and an LSM700 laser-scanning confocal head. Fixed embryos stained by *in situ* hybridization were mounted in 1X PBS containing 2% (w/v) methylcellulose and imaged with the Leica M205FA/DFC500 system using LED illumination arrays and the Leica LAS montage imaging module. Fixed immunostained embryos were mounted in 1X PBS containing 0.5% (w/v) low-melt agarose, and fluorescence images were obtained with a DM4500B/Retiga-SRV system equipped with GFP and TXR filter sets and a 10x/0.30 NA objective.

#### **Cyclopamine treatment of zebrafish embryos**

5-hpf embryos in 10 mL of E3 medium (5 mM NaCl, 0.17 mM KCl, 0.33 mM CaCl<sub>2</sub>, and 0.33 mM MgSO<sub>4</sub>) were treated with an ethanolic solution of cyclopamine (5 µL of a 100 mM stock; 50 µM final concentration) and cultured at 28.5 °C.

## REFERENCES

1. Morley, R.H. et al. A gene regulatory network directed by zebrafish No tail accounts for its roles in mesoderm formation. *Proc. Natl. Acad. Sci. U. S. A.* **106**, 3829-34 (2009).
2. Goering, L.M. et al. An interacting network of T-box genes directs gene expression and fate in the zebrafish mesoderm. *Proc Natl Acad Sci U S A* **100**, 9410-5 (2003).
3. Garnett, A.T. et al. Identification of direct T-box target genes in the developing zebrafish mesoderm. *Development* **136**, 749-60 (2009).
4. Martin, B.L. & Kimelman, D. Regulation of canonical Wnt signaling by Brachyury is essential for posterior mesoderm formation. *Dev. Cell* **15**, 121-33 (2008).
5. Lightcap, C.M. et al. Interaction with LC8 is required for Pak1 nuclear import and is indispensable for zebrafish development. *PLoS One* **4**, e6025 (2009).
6. Lewis, K.E., Bates, J. & Eisen, J.S. Regulation of *iro3* expression in the zebrafish spinal cord. *Dev. Dyn.* **232**, 140-8 (2005).
7. Veeman, M.T., Slusarski, D.C., Kaykas, A., Louie, S.H. & Moon, R.T. Zebrafish *prickle*, a modulator of noncanonical Wnt/Fz signaling, regulates gastrulation movements. *Curr. Biol.* **13**, 680-5 (2003).
8. Gansner, J.M. & Gitlin, J.D. Essential role for the alpha 1 chain of type VIII collagen in zebrafish notochord formation. *Dev. Dyn.* **237**, 3715-26 (2008).
9. Eimon, P.M. et al. Delineation of the cell-extrinsic apoptosis pathway in the zebrafish. *Cell Death Differ.* **13**, 1619-30 (2006).
10. Kottgen, M. et al. TRPP2 and TRPV4 form a polymodal sensory channel complex. *J. Cell Biol.* **182**, 437-47 (2008).
11. Carney, T.J. et al. Genetic analysis of fin development in zebrafish identifies furin and hemicentin1 as potential novel fraser syndrome disease genes. *PLoS Genet.* **6**, e1000907 (2010).



12. van Eeden, F.J. et al. Genetic analysis of fin formation in the zebrafish, *Danio rerio*. *Development* **123**, 255-62 (1996).
13. Harvey, S.A. & Logan, M.P. *sall4* acts downstream of *tbx5* and is required for pectoral fin outgrowth. *Development* **133**, 1165-73 (2006).
14. Luo, T. et al. Inca: a novel p21-activated kinase-associated protein required for cranial neural crest development. *Development* **134**, 1279-89 (2007).
15. Srinivas, B.P., Woo, J., Leong, W.Y. & Roy, S. A conserved molecular pathway mediates myoblast fusion in insects and vertebrates. *Nat. Genet.* **39**, 781-6 (2007).
16. Lorent, K. et al. Inhibition of Jagged-mediated Notch signaling disrupts zebrafish biliary development and generates multi-organ defects compatible with an Alagille syndrome phenocopy. *Development* **131**, 5753-66 (2004).
17. Milan, D.J., Giokas, A.C., Serluca, F.C., Peterson, R.T. & MacRae, C.A. Notch1b and neuregulin are required for specification of central cardiac conduction tissue. *Development* **133**, 1125-32 (2006).
18. Yeo, S.Y., Kim, M., Kim, H.S., Huh, T.L. & Chitnis, A.B. Fluorescent protein expression driven by *her4* regulatory elements reveals the spatiotemporal pattern of Notch signaling in the nervous system of zebrafish embryos. *Dev. Biol.* **301**, 555-67 (2007).
19. Maves, L. et al. Pbx homeodomain proteins direct MyoD activity to promote fast-muscle differentiation. *Development* **134**, 3371-82 (2007).
20. Etard, C. et al. The UCS factor Steif/Unc-45b interacts with the heat shock protein Hsp90a during myofibrillogenesis. *Dev. Biol.* **308**, 133-43 (2007).
21. Chen, Y.H. & Tsai, H.J. Treatment with Myf5-morpholino results in somite patterning and brain formation defects in zebrafish. *Differentiation* **70**, 447-56 (2002).
22. Tan, X., Rotllant, J., Li, H., De Deyne, P. & Du, S.J. SmyD1, a histone methyltransferase, is required for myofibril organization and muscle contraction in zebrafish embryos. *Proc. Natl. Acad. Sci. U. S. A.* **103**, 2713-8 (2006).

23. Seeley, M. et al. Depletion of zebrafish titin reduces cardiac contractility by disrupting the assembly of Z-discs and A-bands. *Circ. Res.* **100**, 238-45 (2007).
24. van Eeden, F.J. et al. Mutations affecting somite formation and patterning in the zebrafish, *Danio rerio*. *Development* **123**, 153-64 (1996).
25. Wingert, R.A. et al. The *cdx* genes and retinoic acid control the positioning and segmentation of the zebrafish pronephros. *PLoS Genet.* **3**, 1922-38 (2007).
26. Alexa, K. et al. Maternal and zygotic *aldh1a2* activity is required for pancreas development in zebrafish. *PLoS One* **4**, e8261 (2009).
27. Bessa, J. et al. *meis1* regulates cyclin D1 and c-myc expression, and controls the proliferation of the multipotent cells in the early developing zebrafish eye. *Development* **135**, 799-803 (2008).
28. Lekven, A.C., Thorpe, C.J., Waxman, J.S. & Moon, R.T. Zebrafish *wnt8* encodes two *wnt8* proteins on a bicistronic transcript and is required for mesoderm and neurectoderm patterning. *Dev. Cell* **1**, 103-14 (2001).
29. Thorpe, C.J., Weidinger, G. & Moon, R.T. Wnt/beta-catenin regulation of the Sp1-related transcription factor *sp5l* promotes tail development in zebrafish. *Development* **132**, 1763-72 (2005).
30. Shimizu, T., Bae, Y.K., Muraoka, O. & Hibi, M. Interaction of Wnt and caudal-related genes in zebrafish posterior body formation. *Dev. Biol.* **279**, 125-41 (2005).
31. Draper, B.W., Stock, D.W. & Kimmel, C.B. Zebrafish *fgf24* functions with *fgf8* to promote posterior mesodermal development. *Development* **130**, 4639-54 (2003).
32. Hanai, J. et al. The muscle-specific ubiquitin ligase atrogenin-1/MAFbx mediates statin-induced muscle toxicity. *J. Clin. Invest.* **117**, 3940-51 (2007).
33. Oates, A.C. & Ho, R.K. Hairy/E(spl)-related (Her) genes are central components of the segmentation oscillator and display redundancy with the Delta/Notch signaling pathway in

- the formation of anterior segmental boundaries in the zebrafish. *Development* **129**, 2929-46 (2002).
34. Hill, M.M. et al. PTRF-Cavin, a conserved cytoplasmic protein required for caveola formation and function. *Cell* **132**, 113-24 (2008).
  35. Nixon, S.J. et al. Zebrafish as a model for caveolin-associated muscle disease; caveolin-3 is required for myofibril organization and muscle cell patterning. *Hum. Mol. Genet.* **14**, 1727-43 (2005).
  36. Ouyang, X. et al. Versatile synthesis and rational design of caged morpholinos. *J. Am. Chem. Soc.* **131**, 13255-69 (2009).
  37. Shestopalov, I.A., Sinha, S. & Chen, J.K. Light-controlled gene silencing in zebrafish embryos. *Nat. Chem. Biol.* **3**, 650-1 (2007).
  38. Robu, M.E. et al. p53 activation by knockdown technologies. *PLoS Genet.* **3**, e78 (2007).
